# Supplementary material for: Safety of Outpatient Closed-Loop Control: First Randomized Crossover Trials of a Wearable Artificial Pancreas
Source: Oxford University Press journal article supplement (doi:10.2337/dc13-2076), 2014-06-12

SUPPLEMENTARY DATA

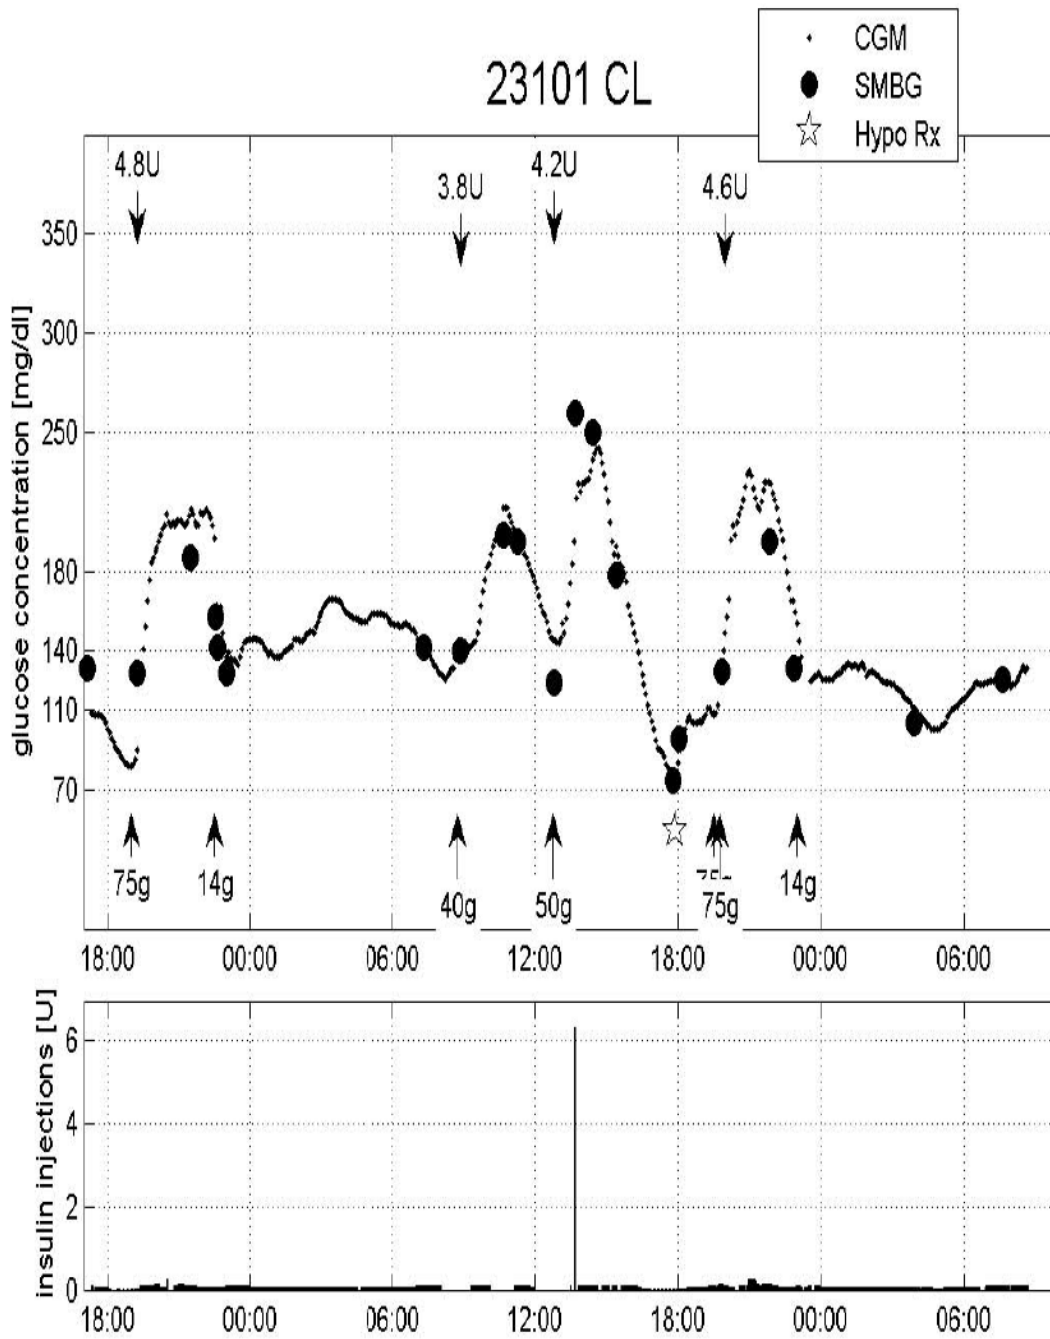

SUPPLEMENTARY DATA

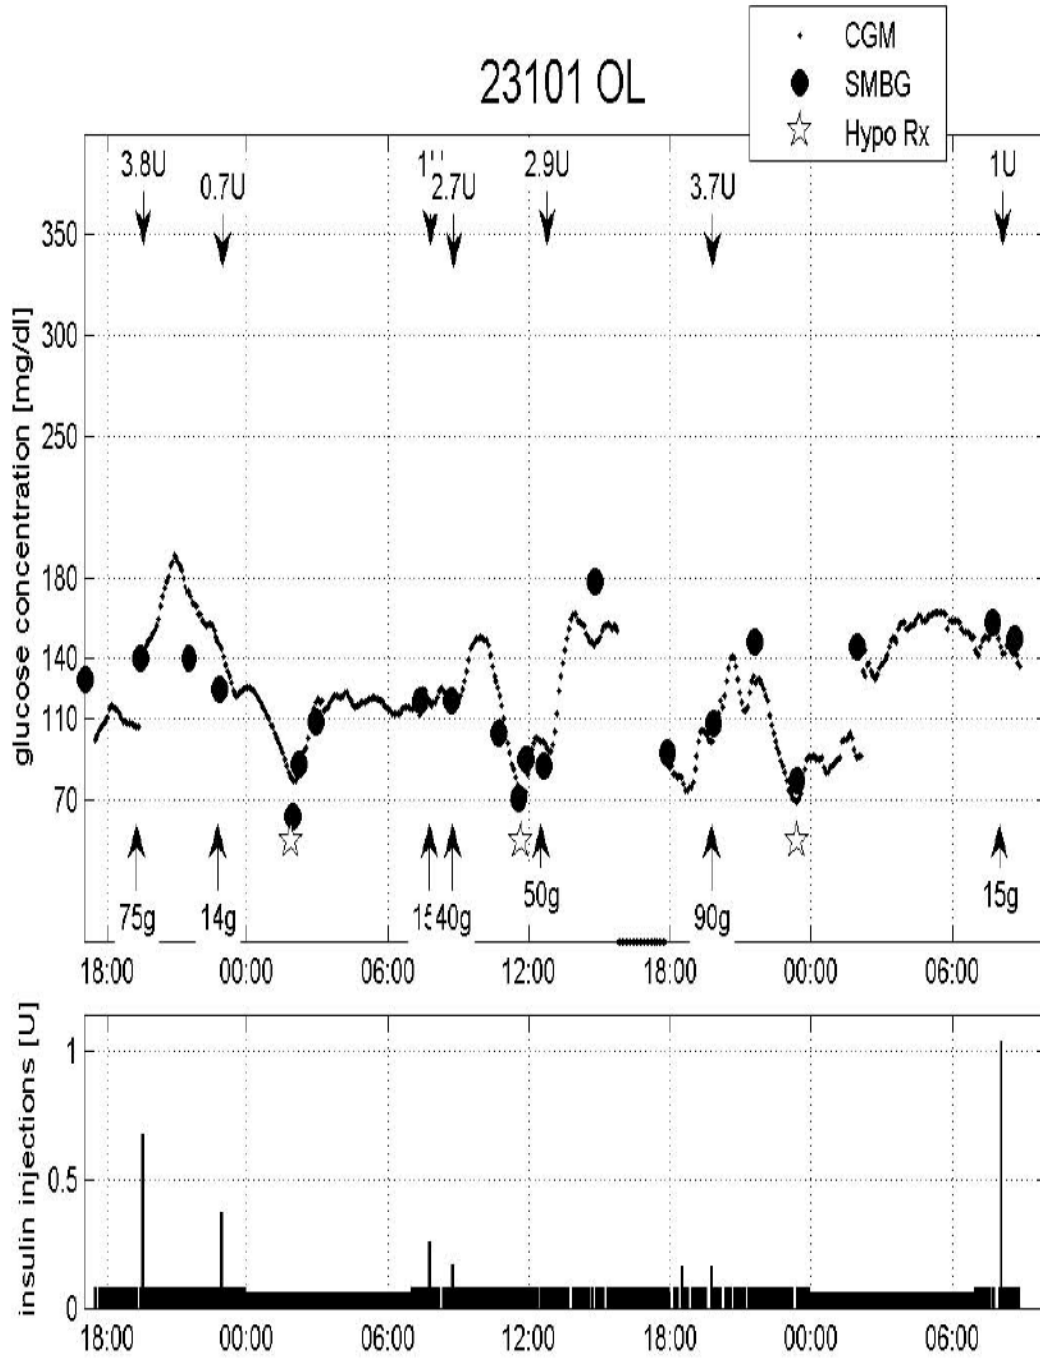

SUPPLEMENTARY DATA

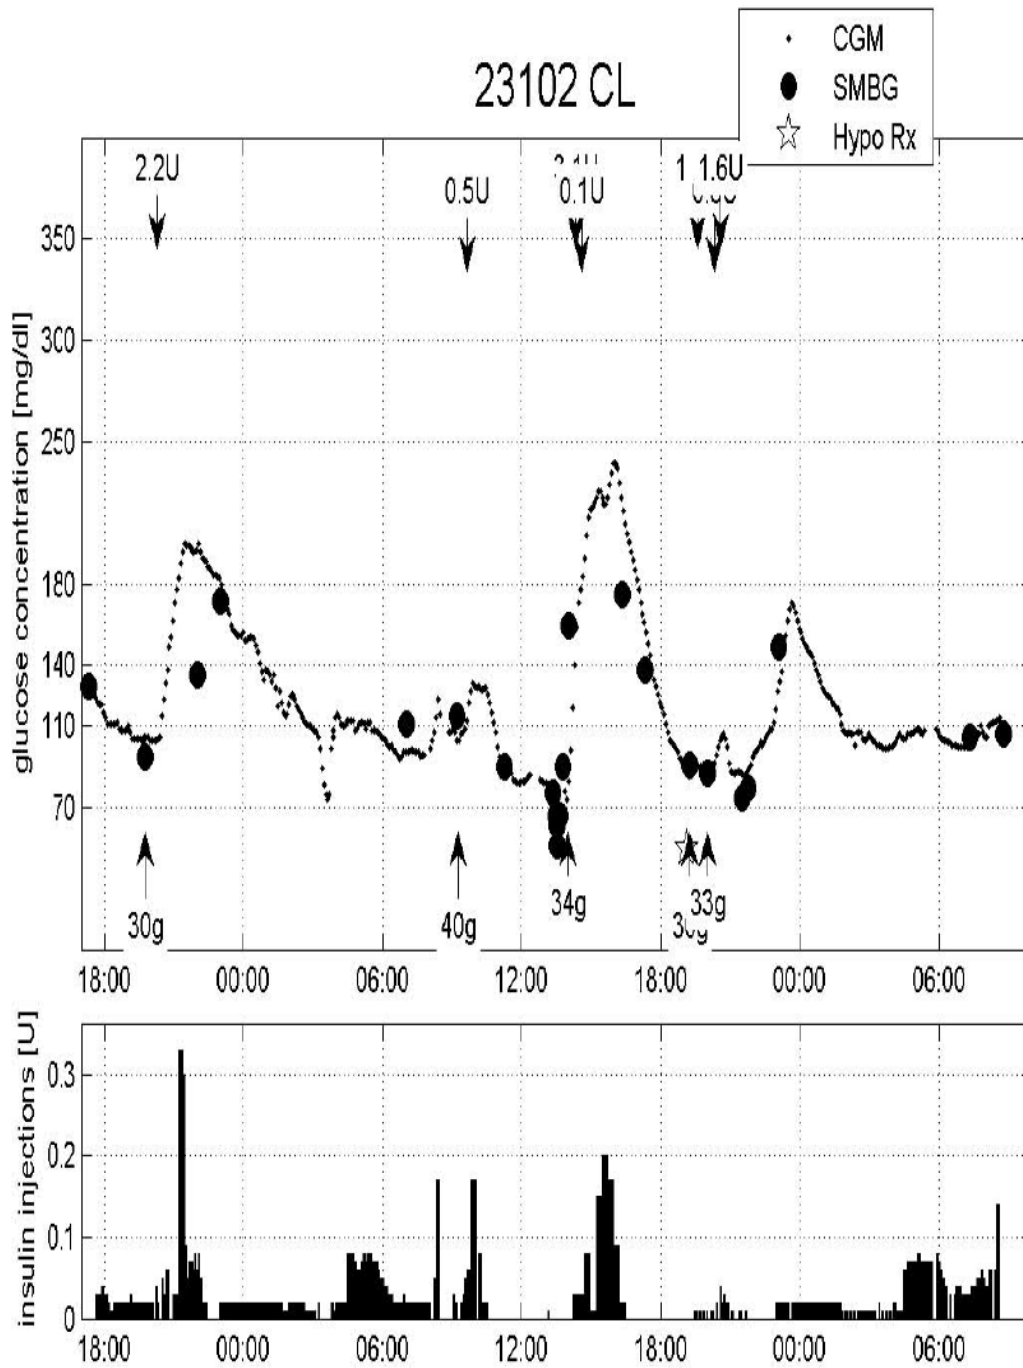

SUPPLEMENTARY DATA

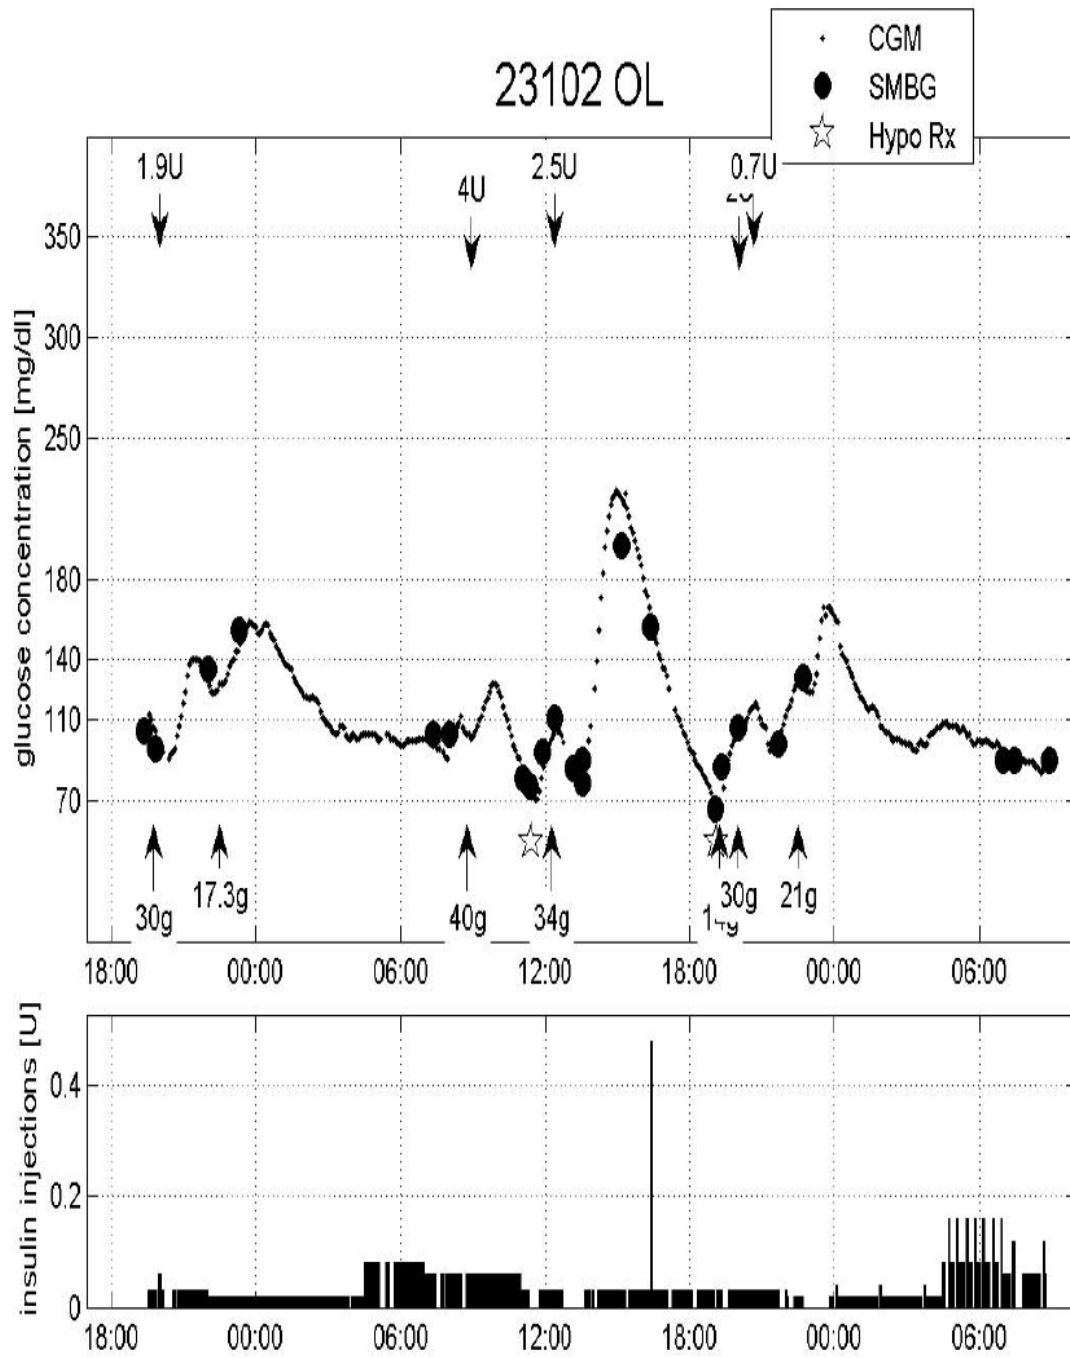

SUPPLEMENTARY DATA

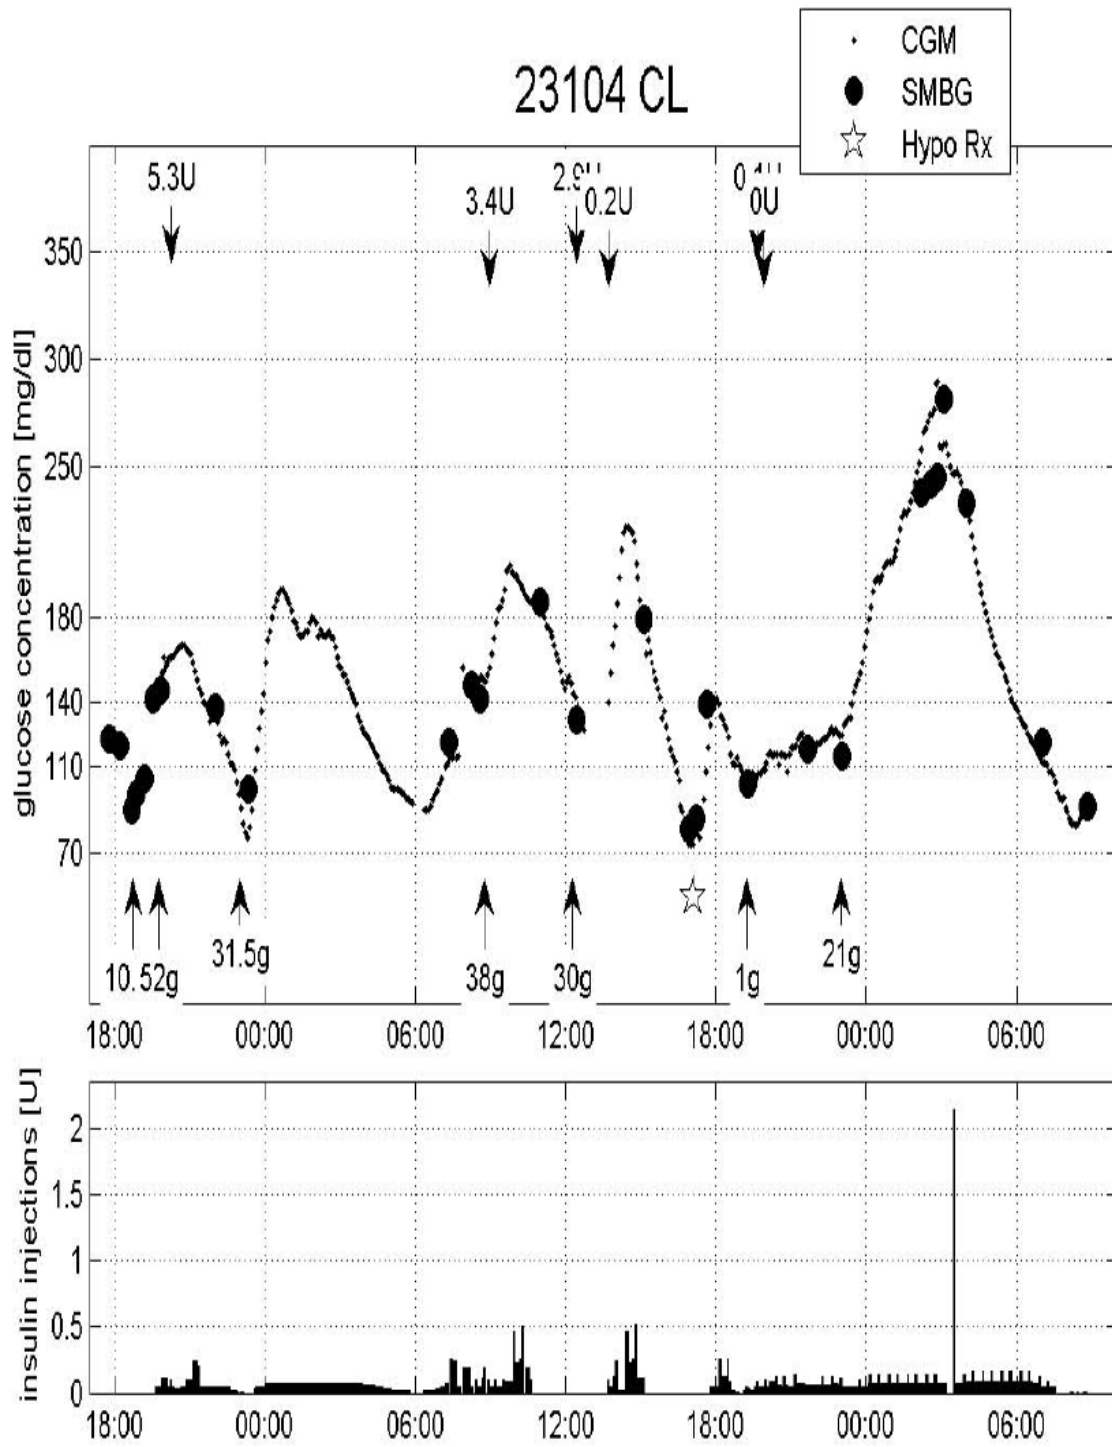

SUPPLEMENTARY DATA

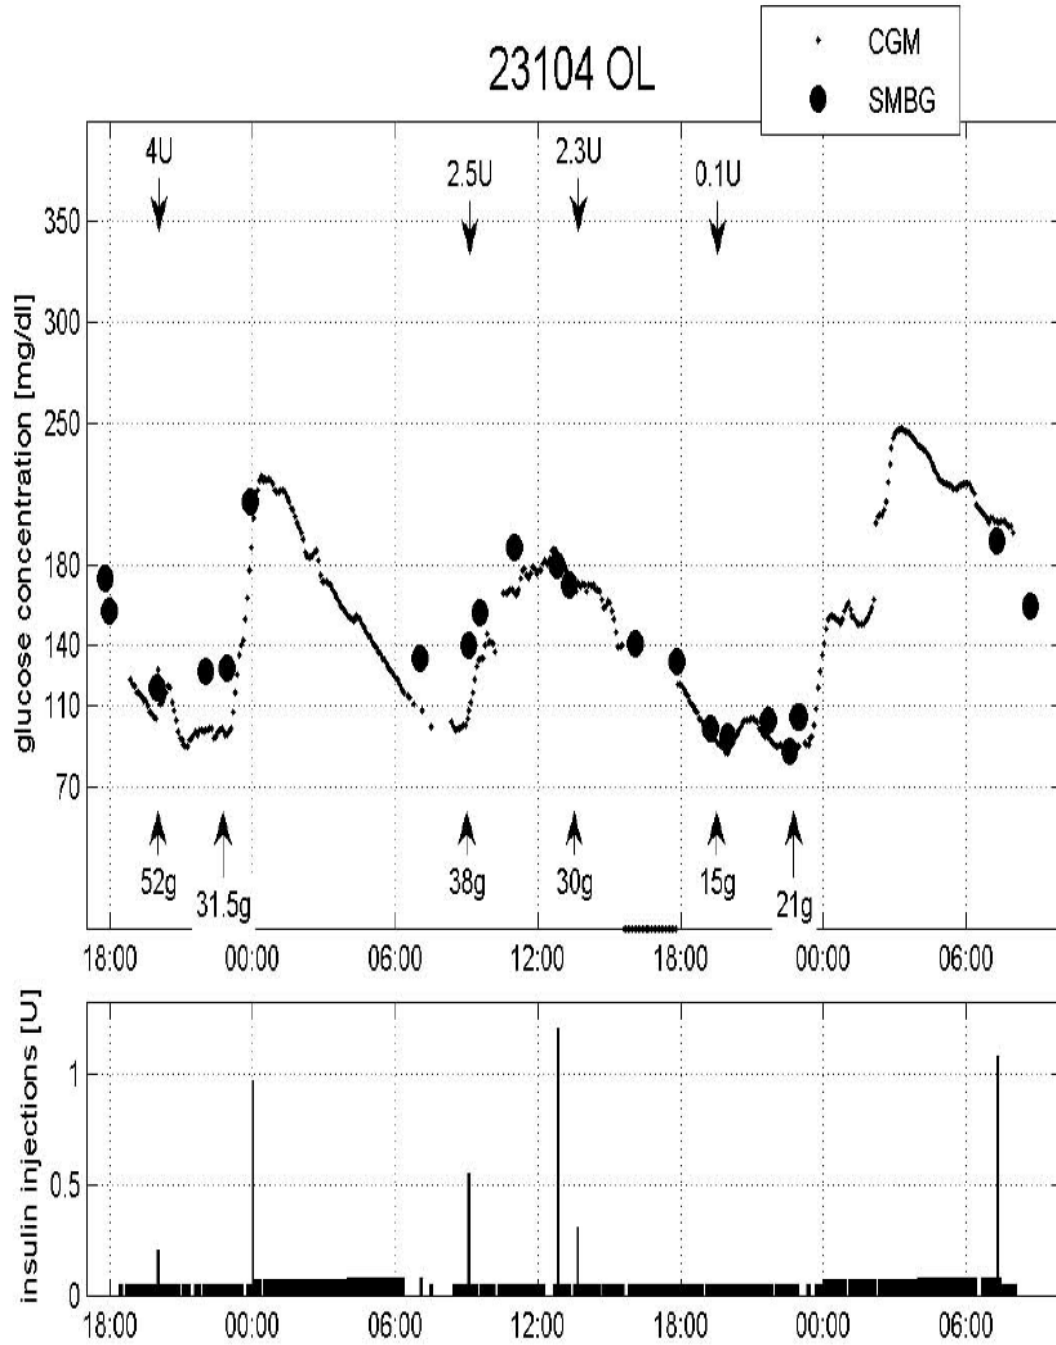

SUPPLEMENTARY DATA

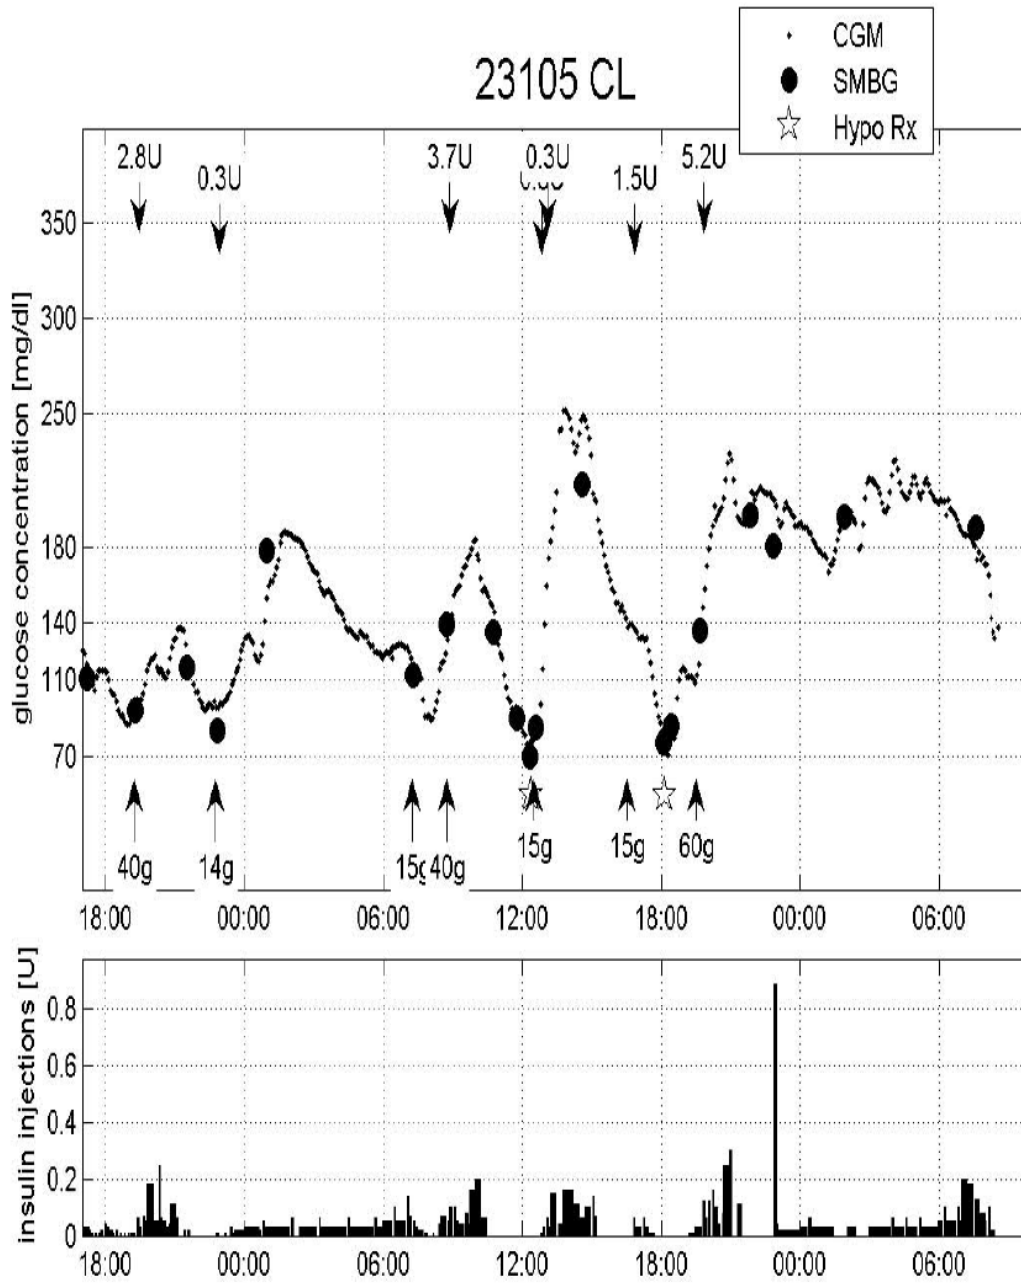

SUPPLEMENTARY DATA

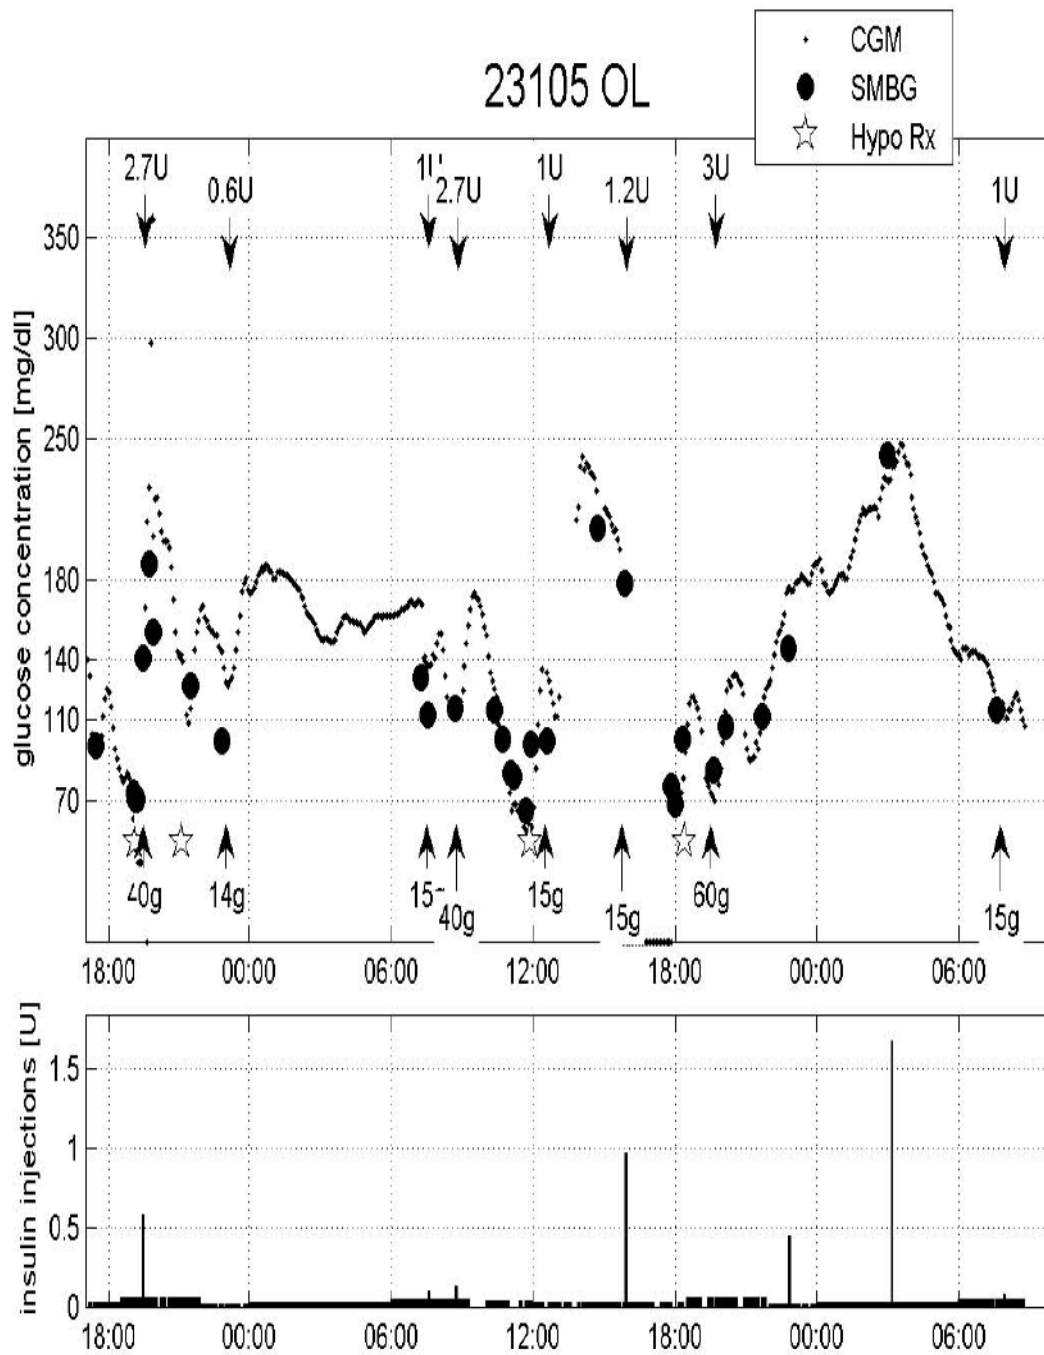



SUPPLEMENTARY DATA

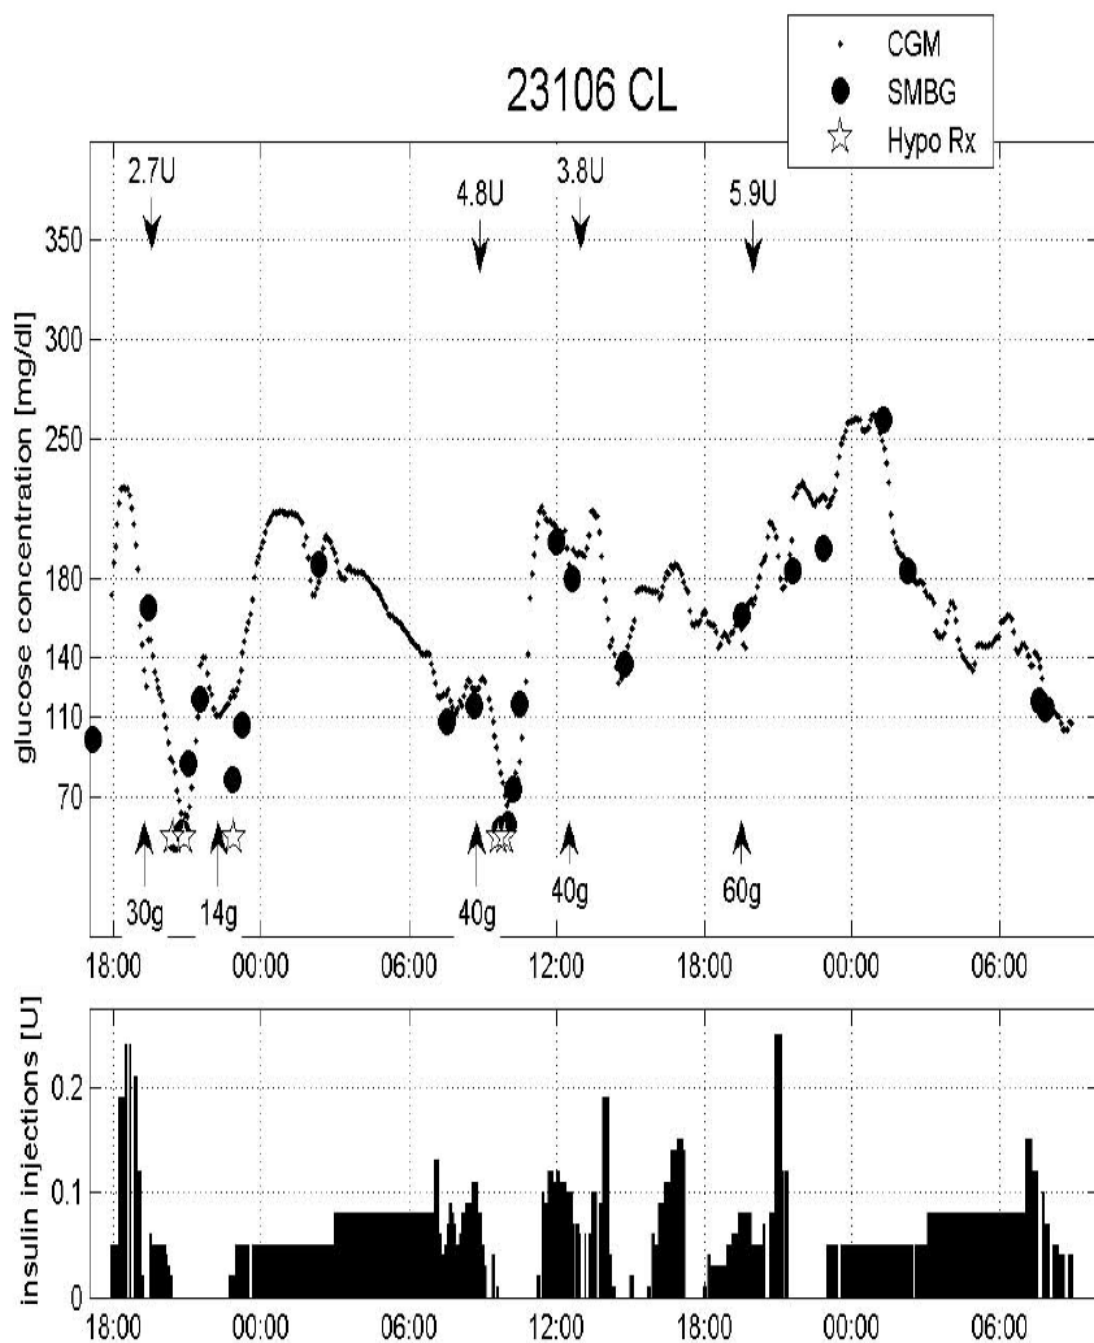

SUPPLEMENTARY DATA

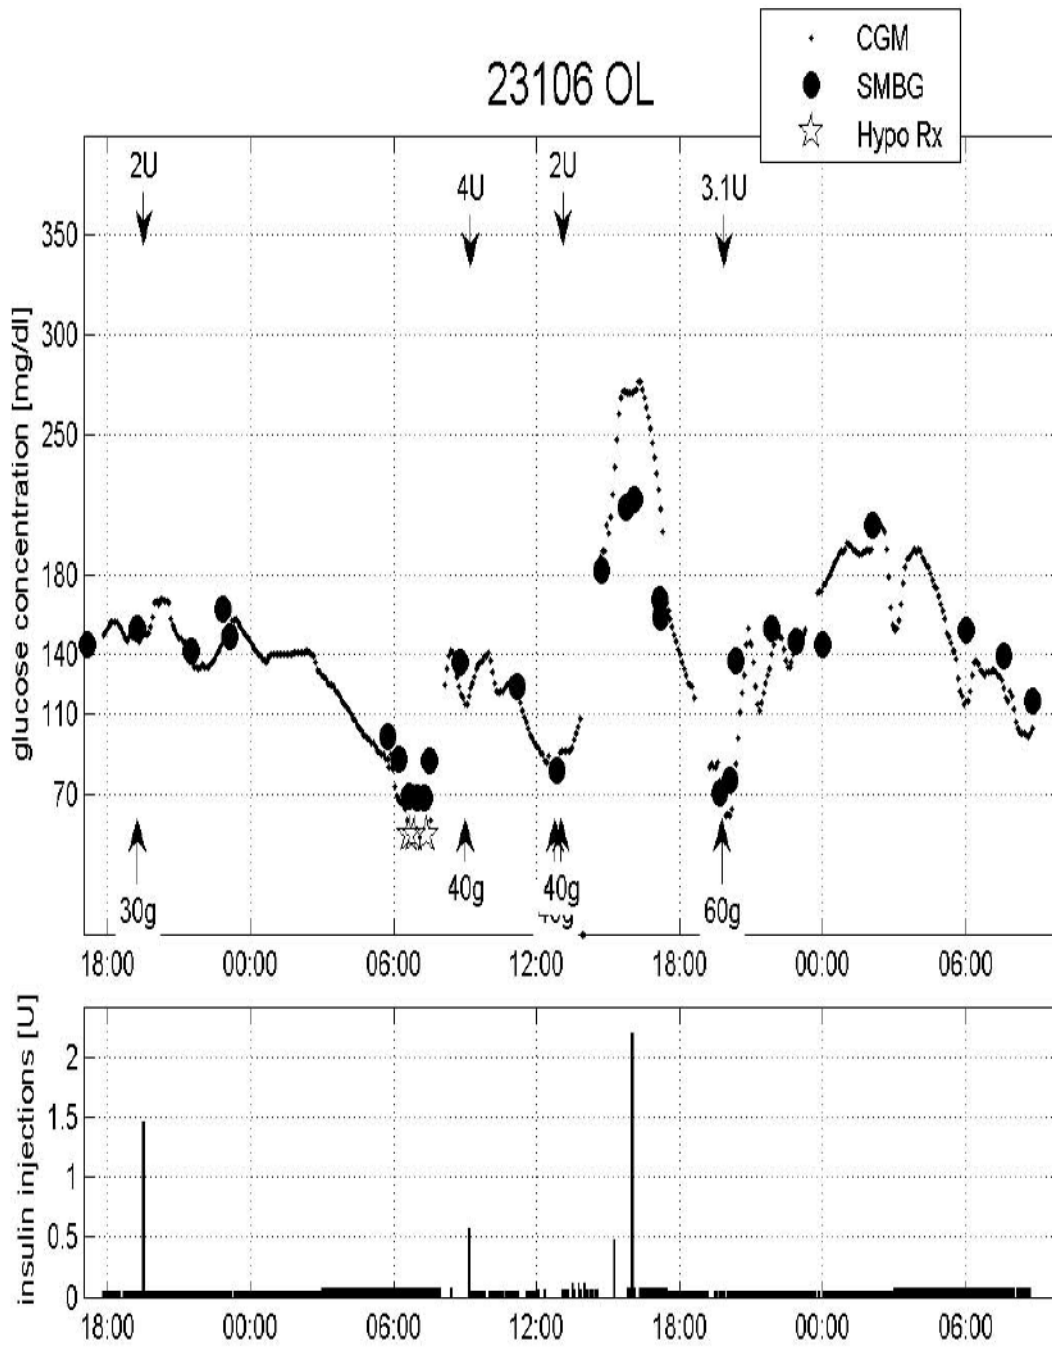

SUPPLEMENTARY DATA

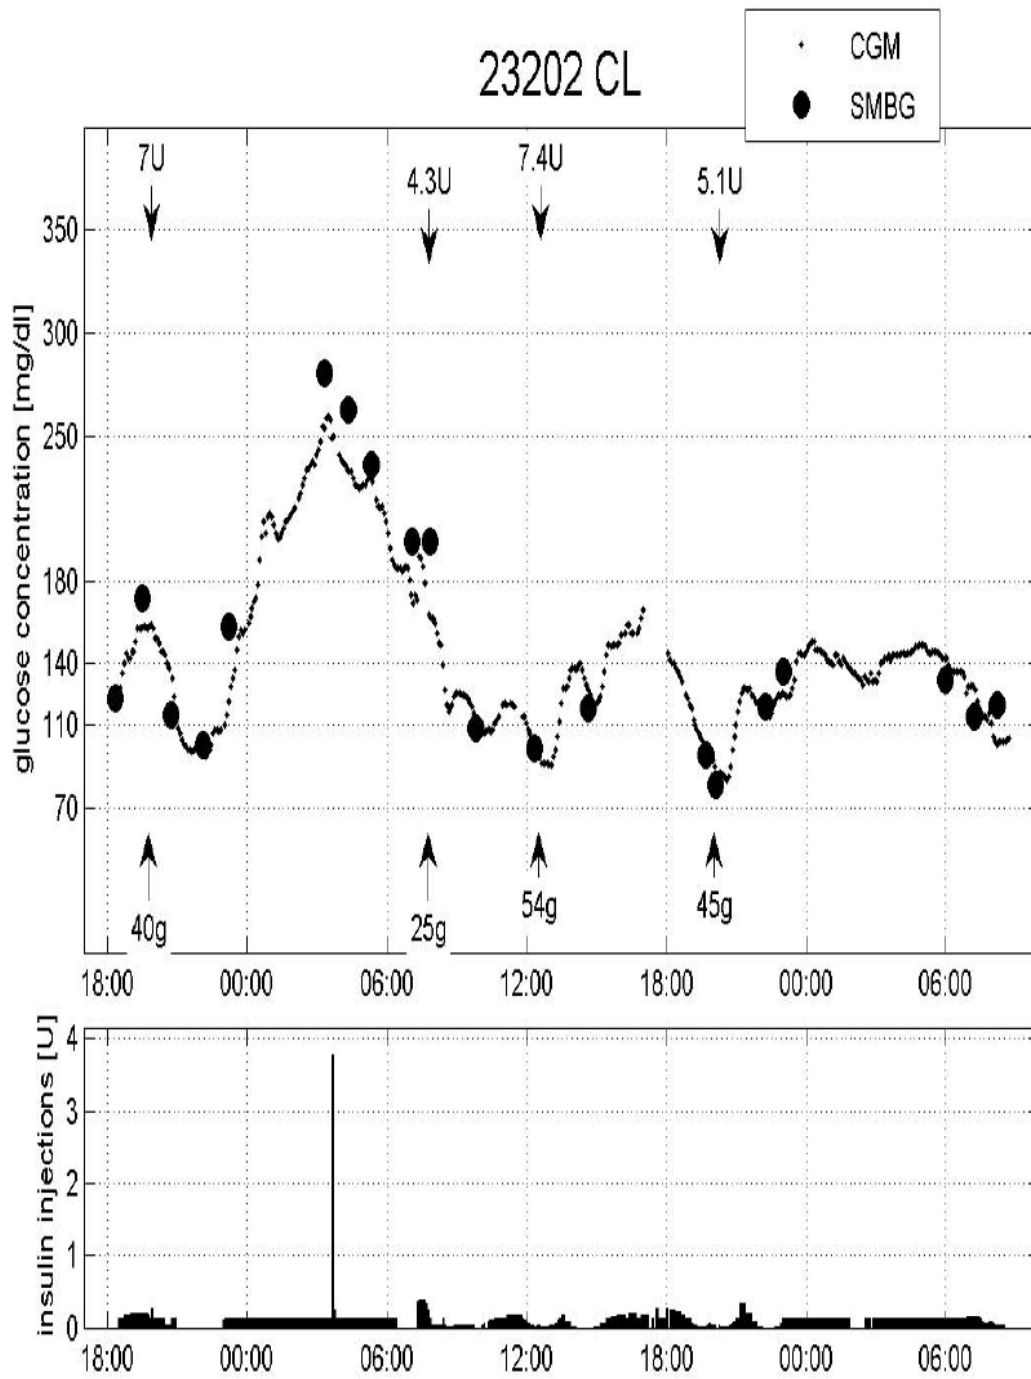

SUPPLEMENTARY DATA

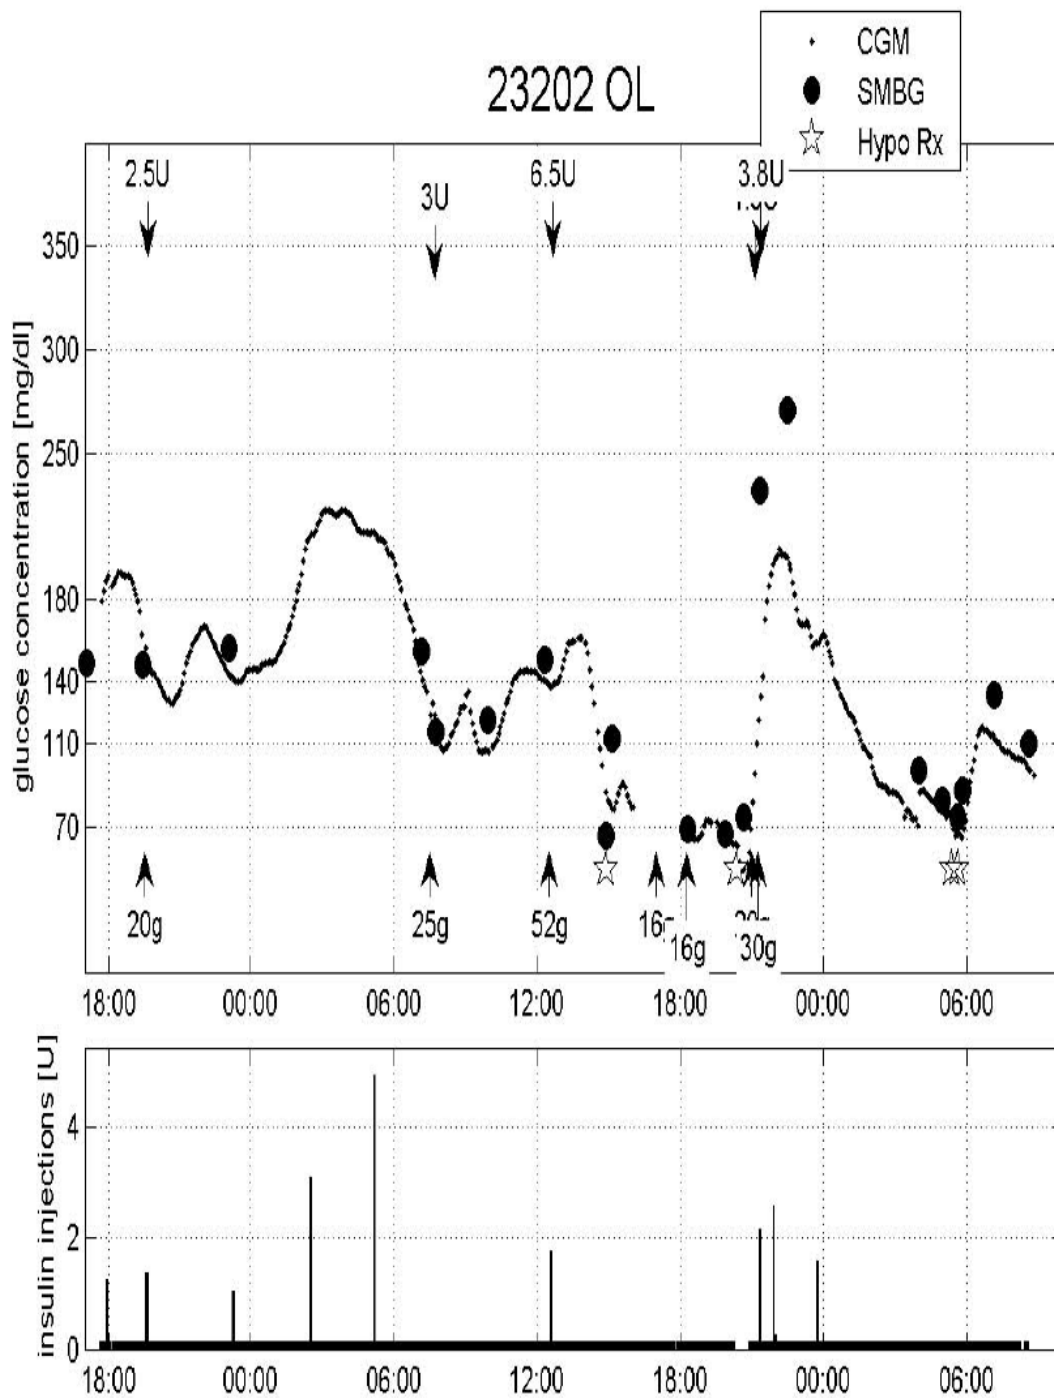

SUPPLEMENTARY DATA

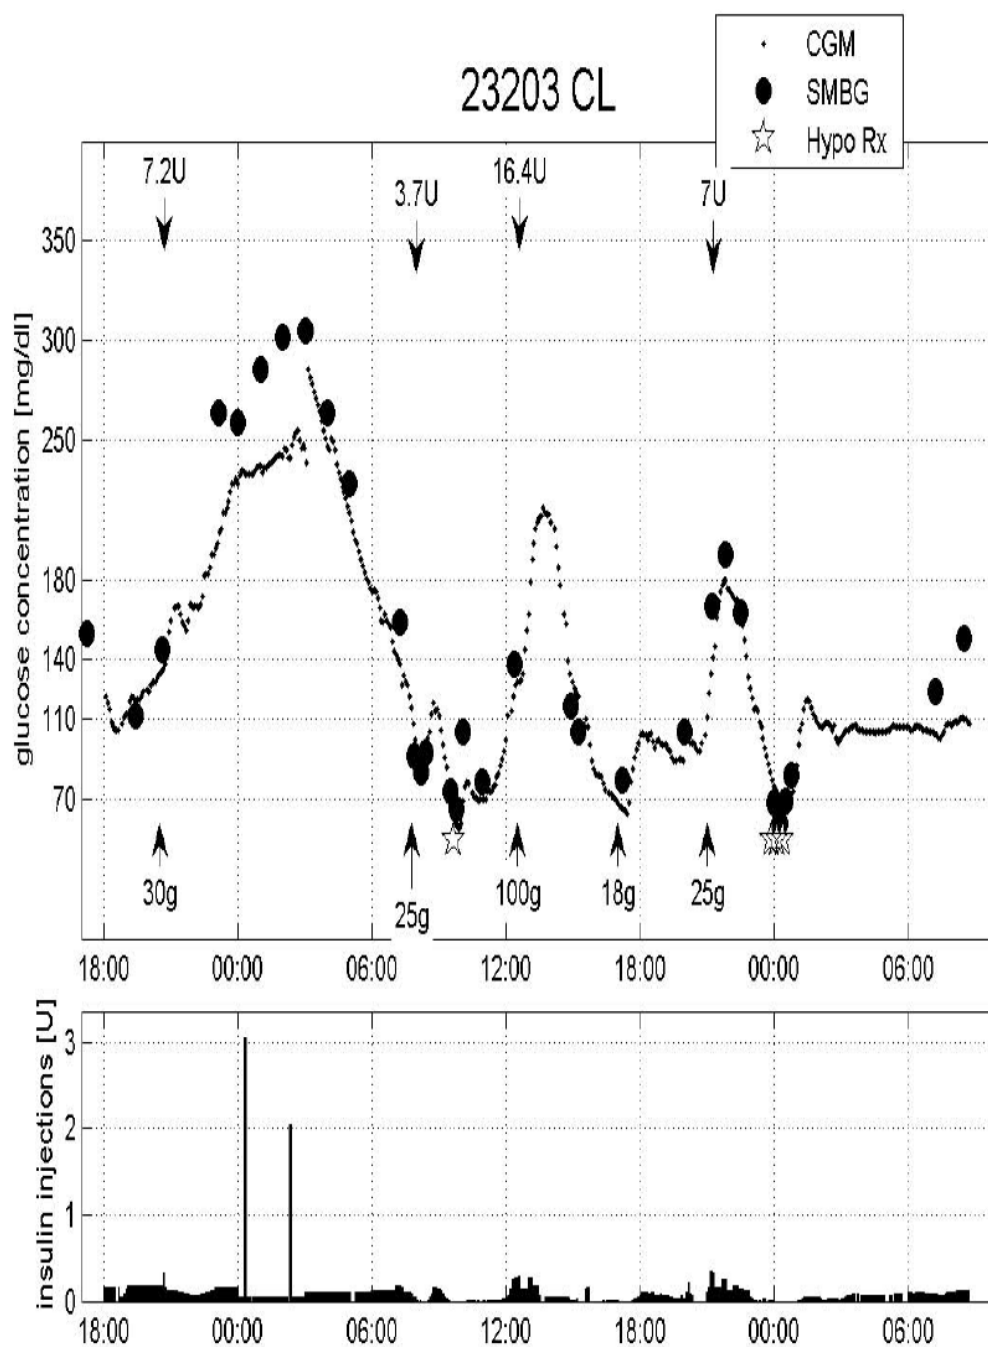

SUPPLEMENTARY DATA

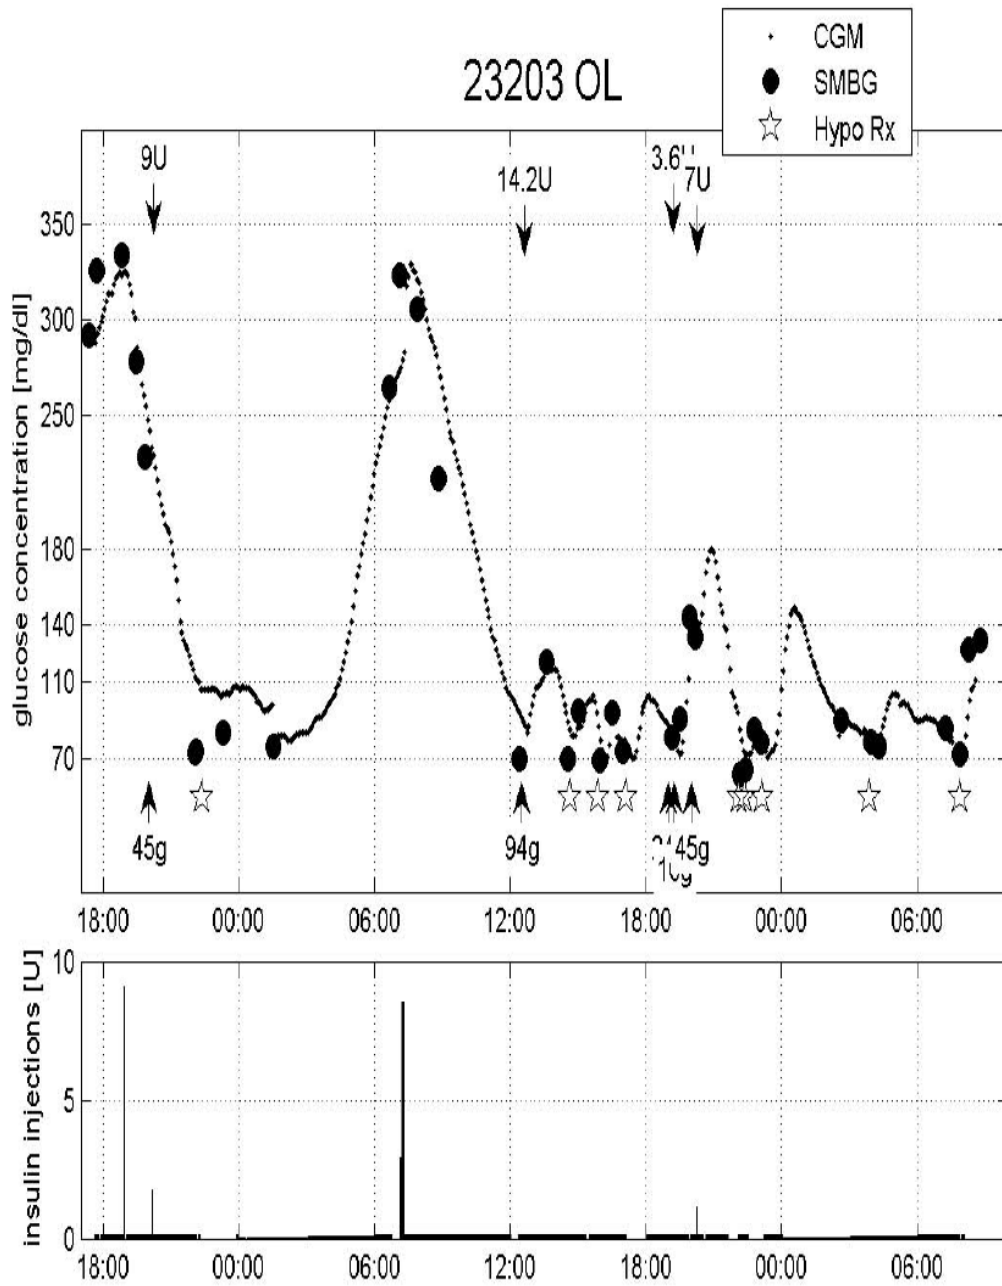

SUPPLEMENTARY DATA

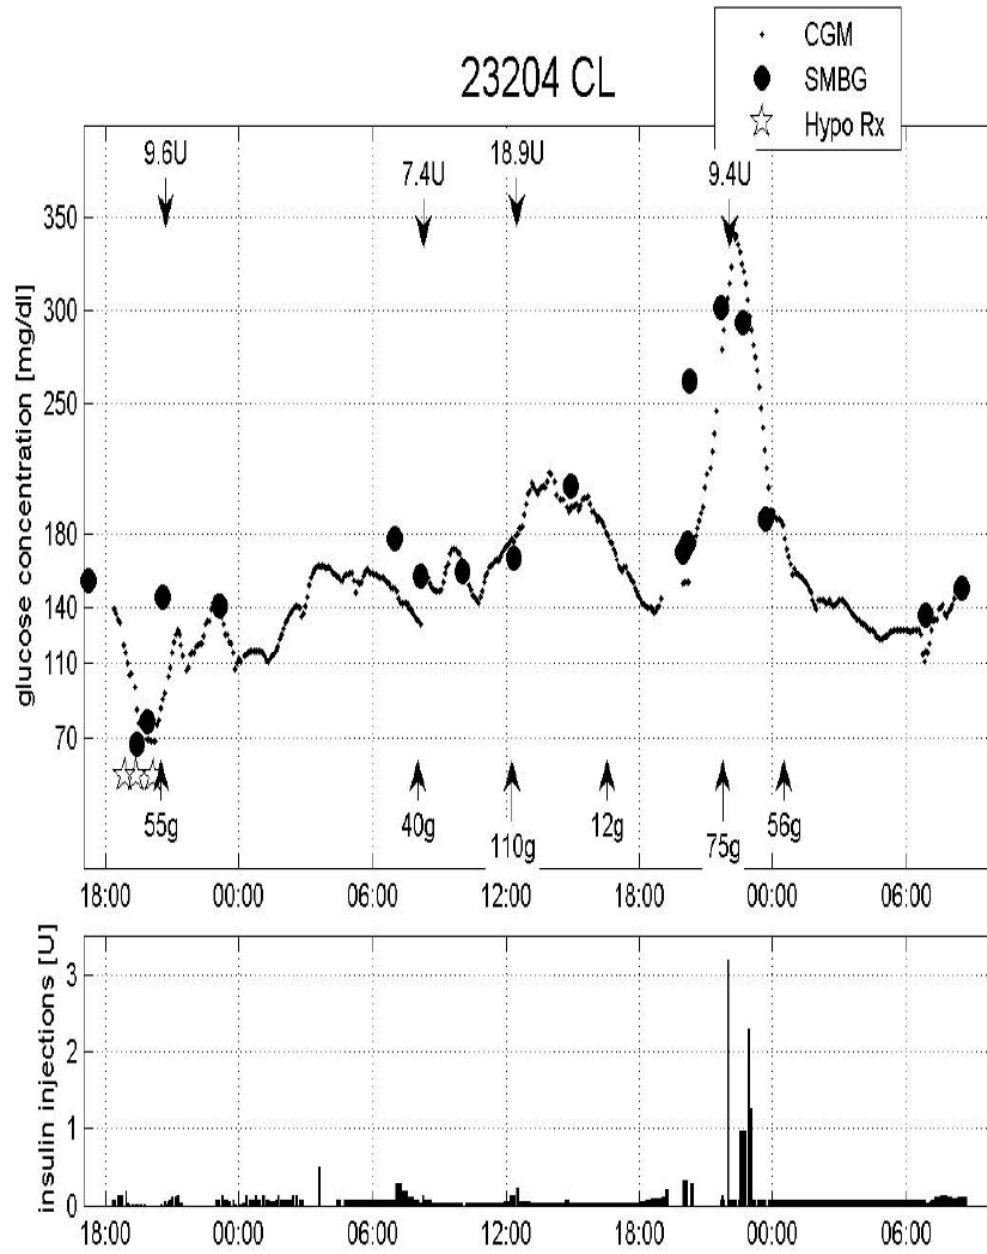

SUPPLEMENTARY DATA

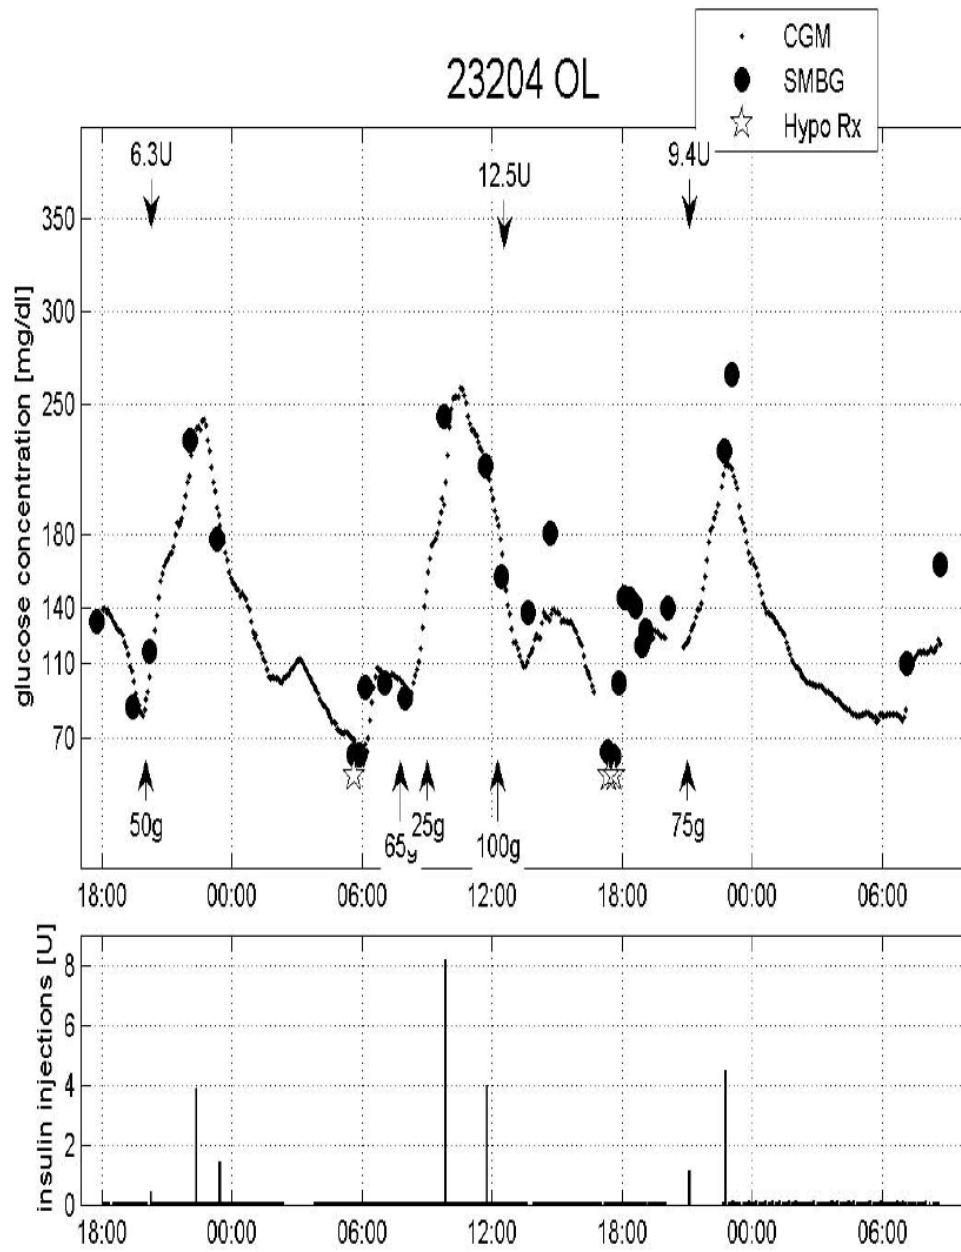



SUPPLEMENTARY DATA

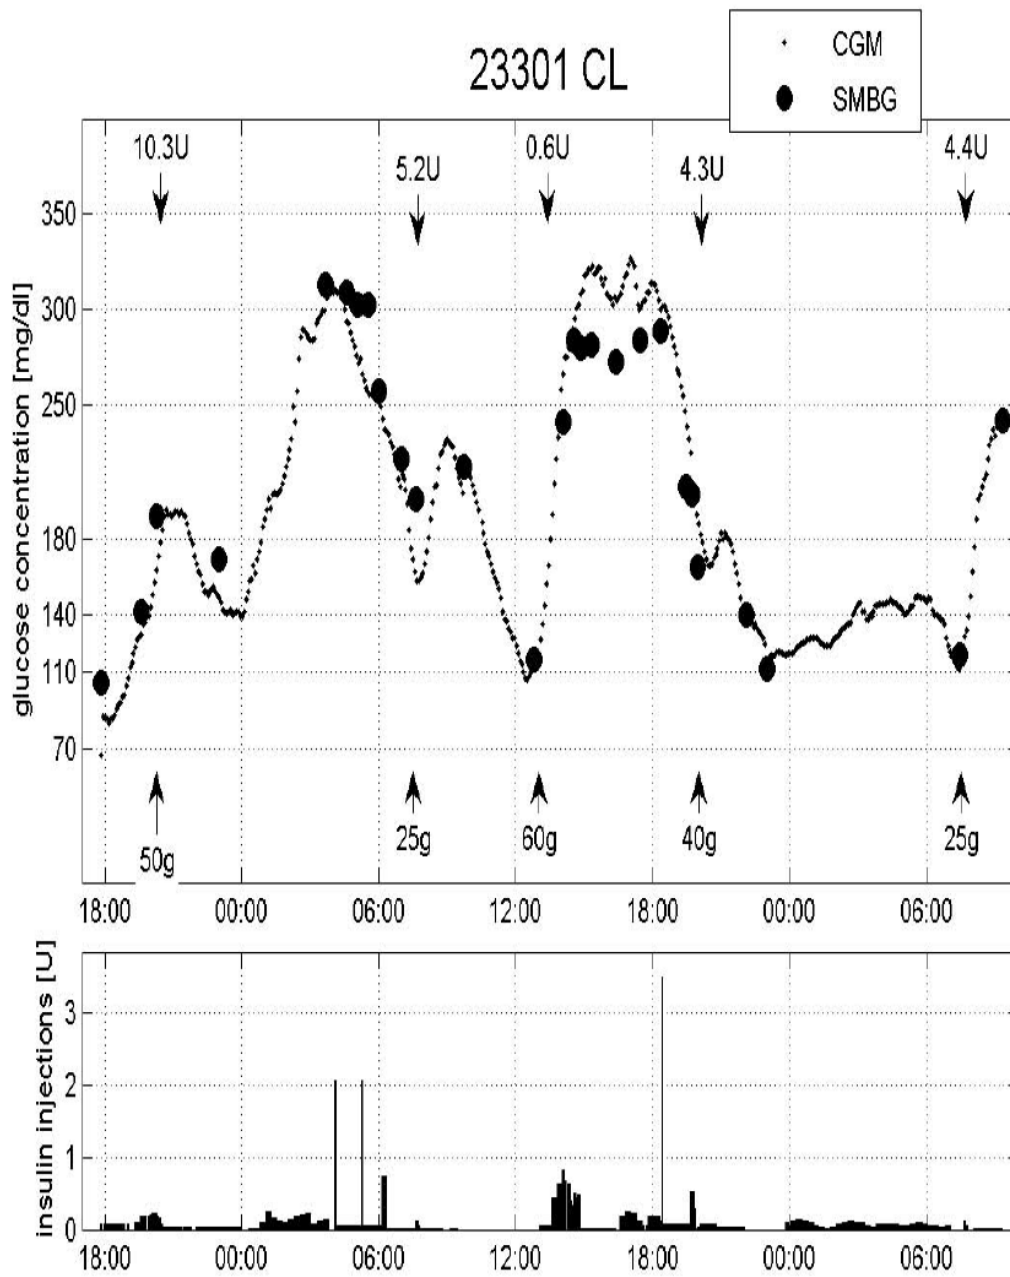

SUPPLEMENTARY DATA

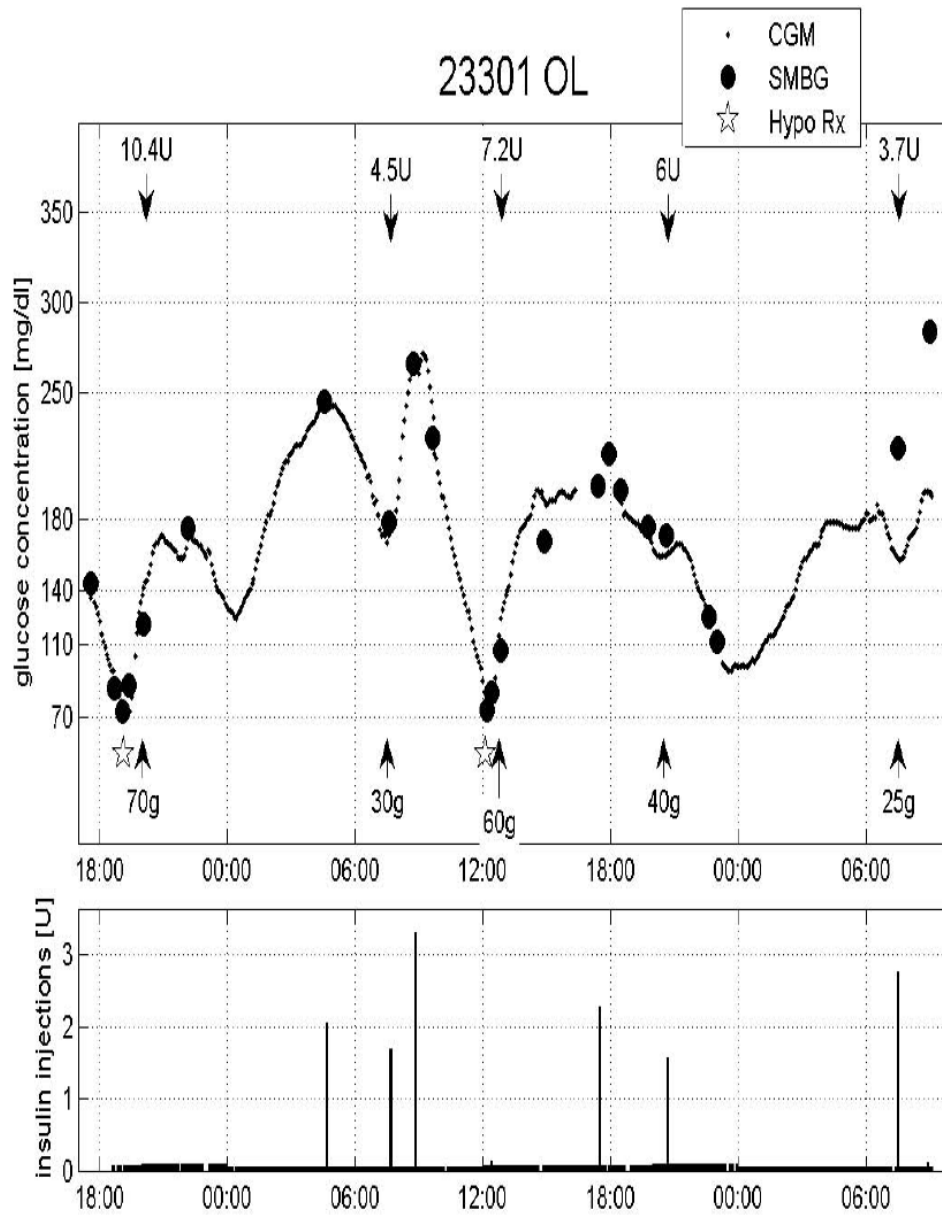

SUPPLEMENTARY DATA

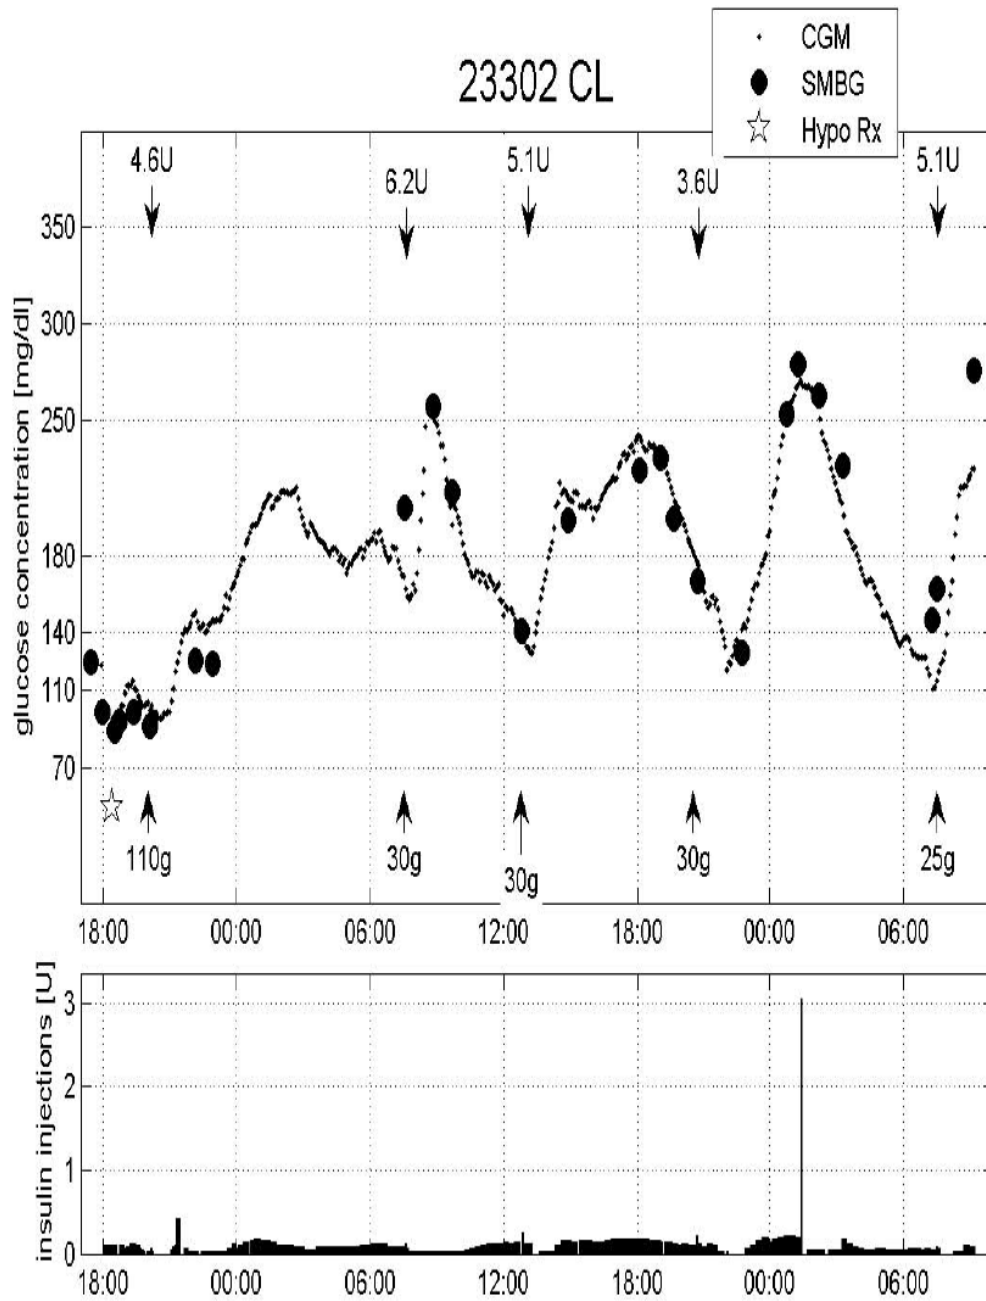

SUPPLEMENTARY DATA

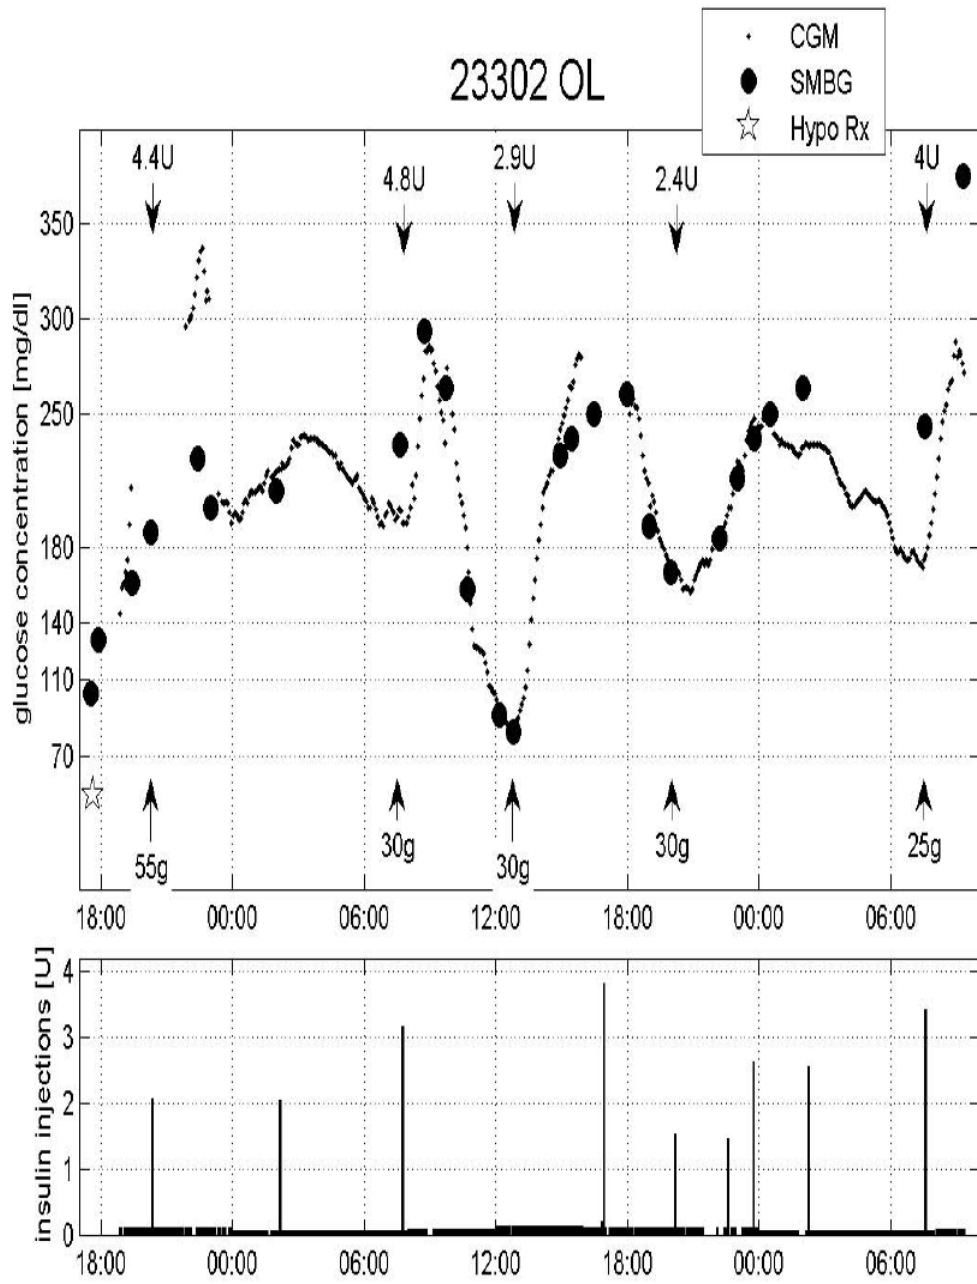

SUPPLEMENTARY DATA

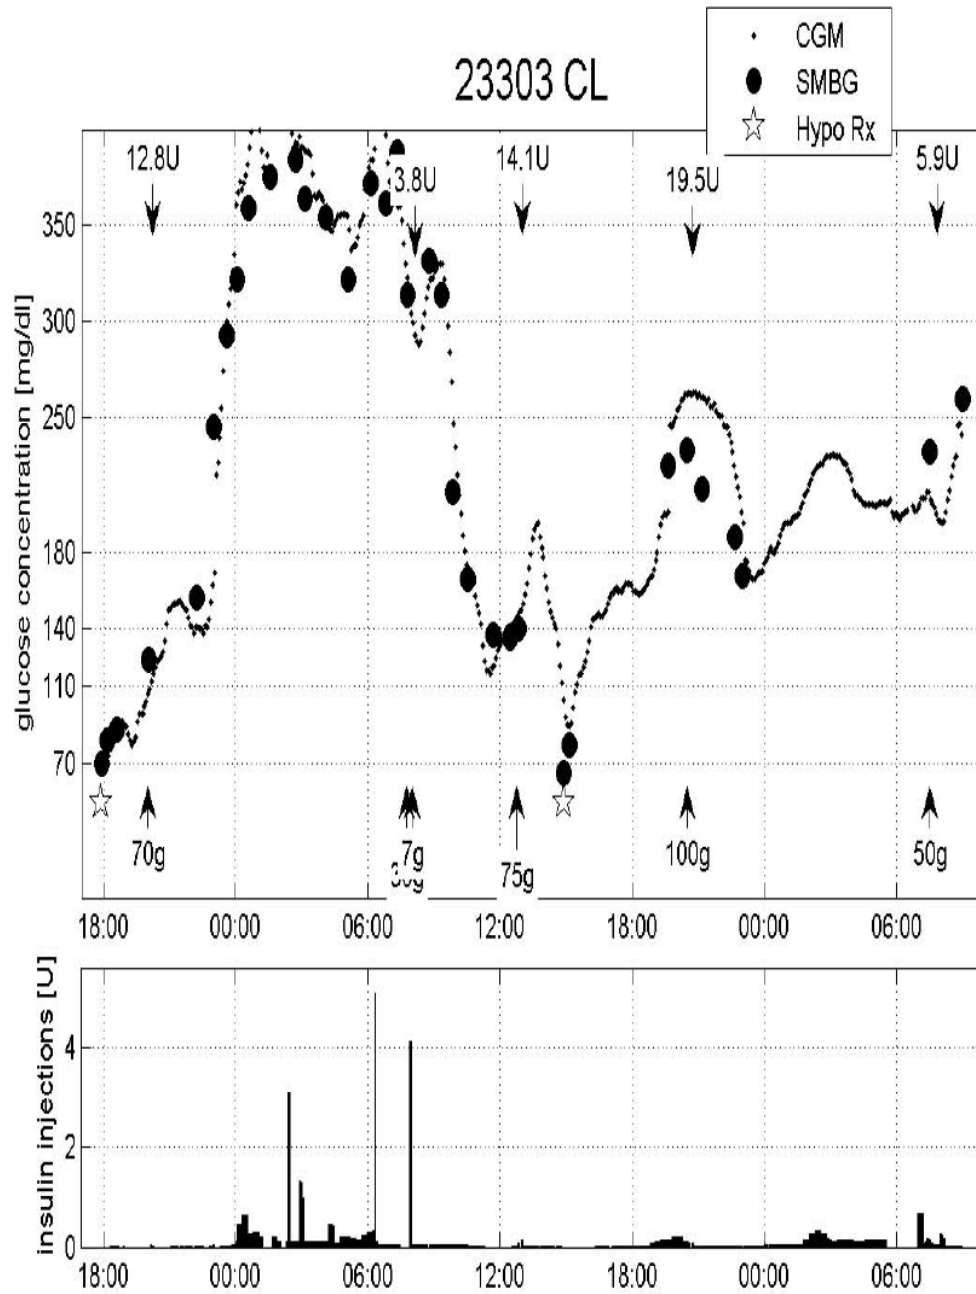

SUPPLEMENTARY DATA

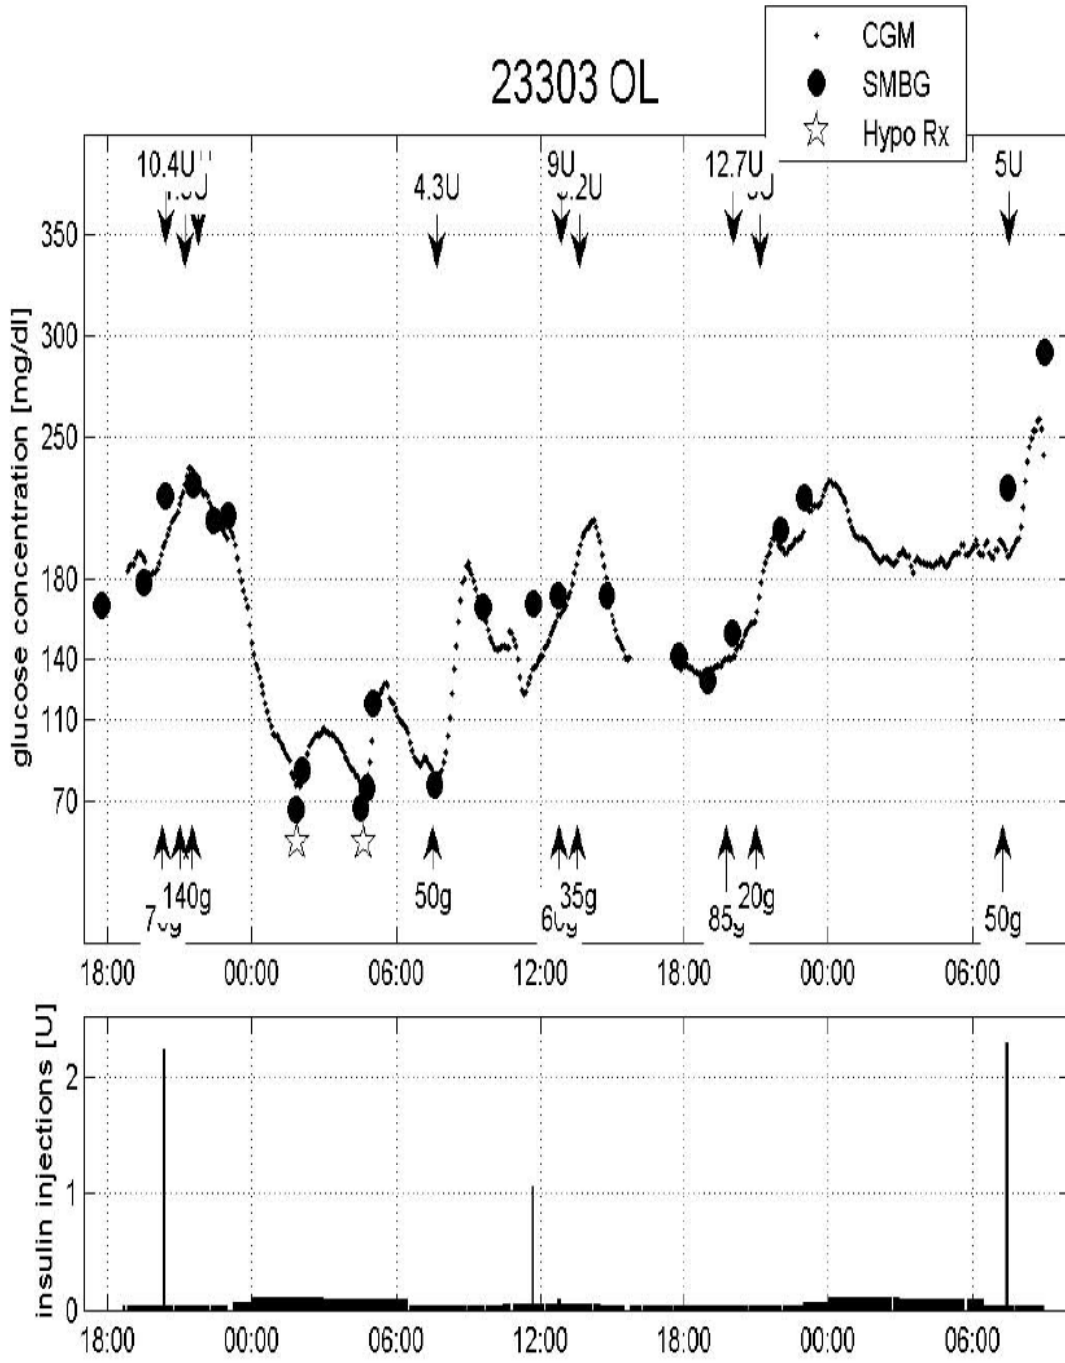

SUPPLEMENTARY DATA

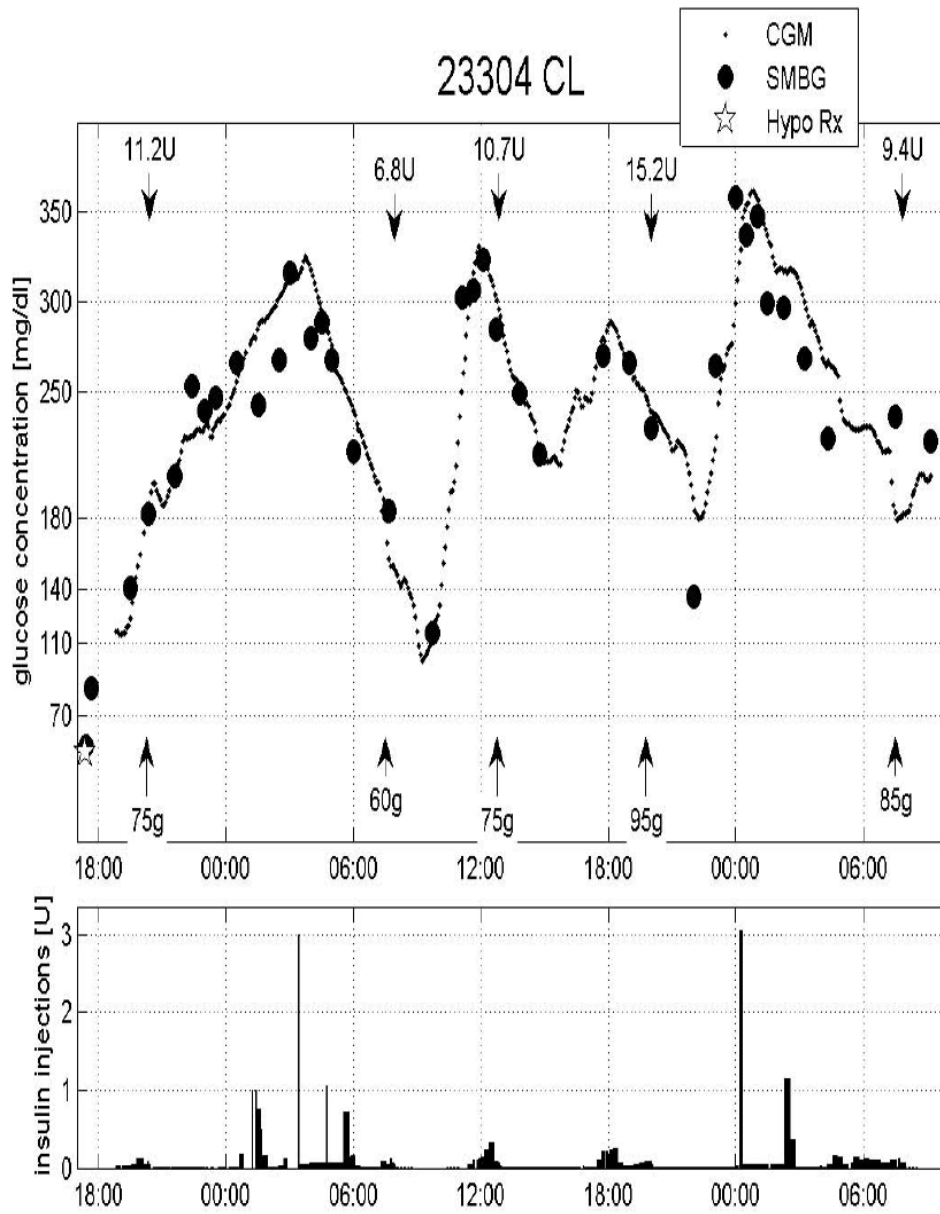

SUPPLEMENTARY DATA

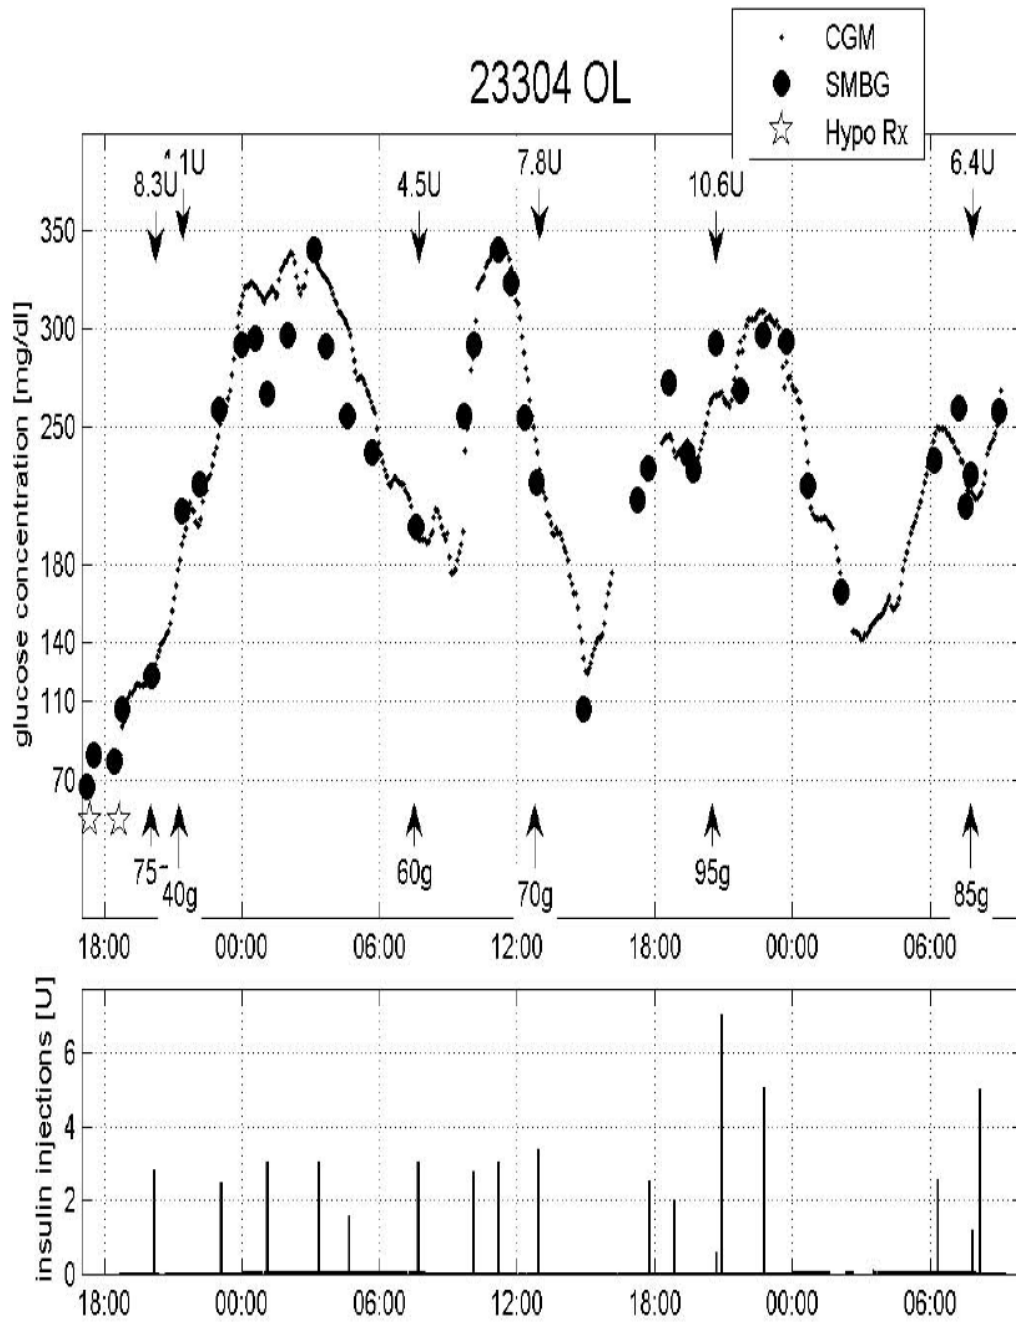



SUPPLEMENTARY DATA

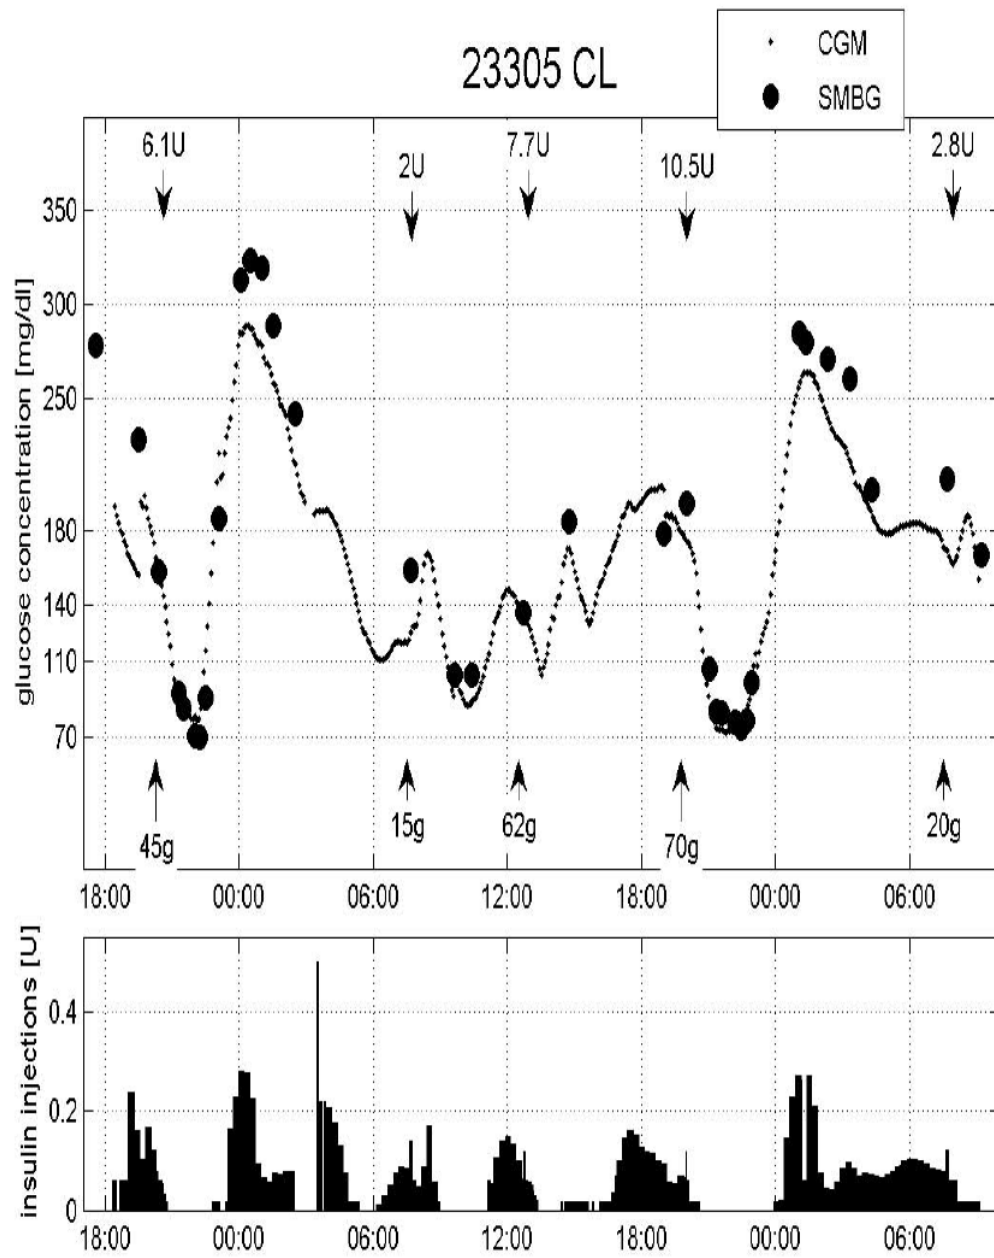

SUPPLEMENTARY DATA

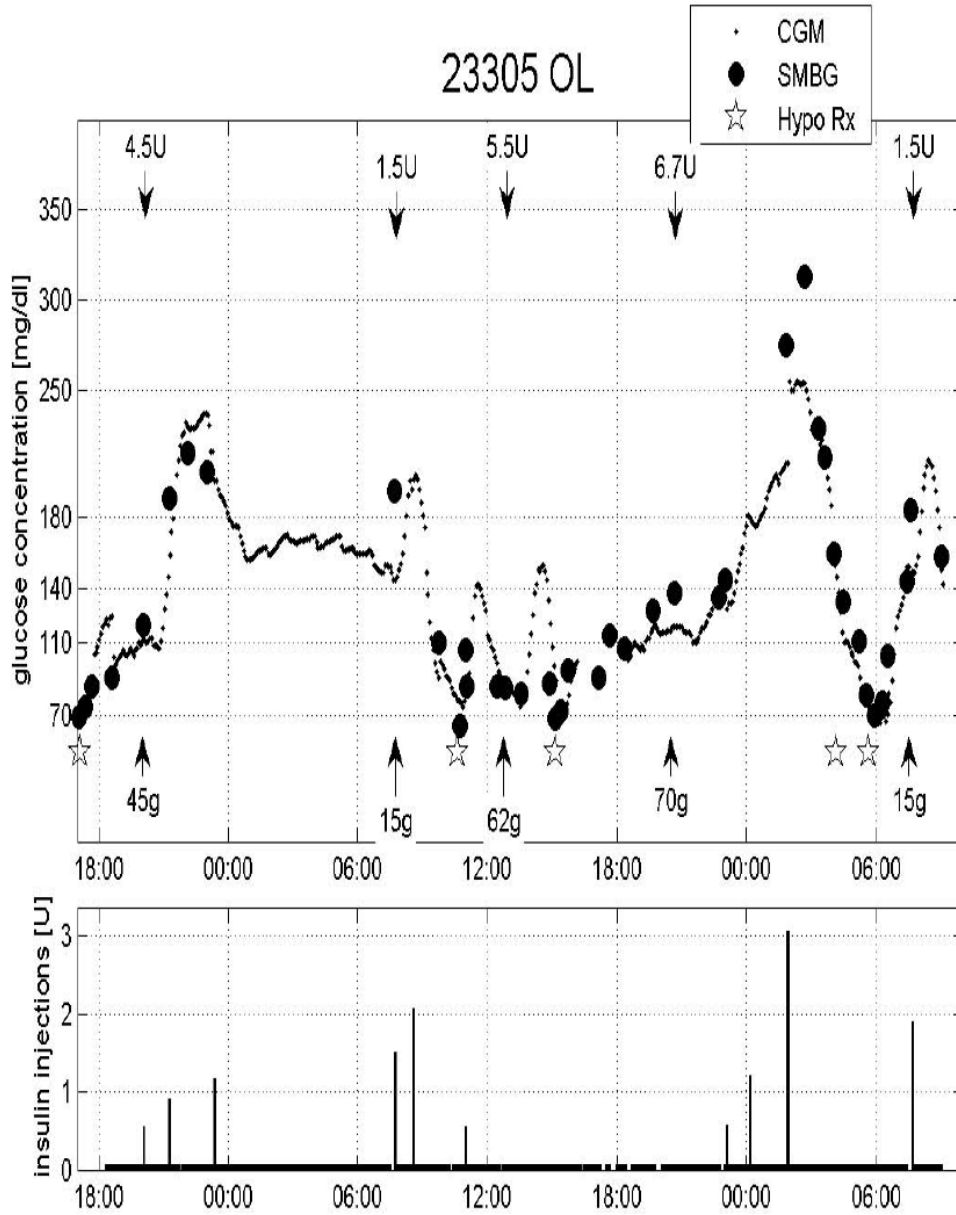

SUPPLEMENTARY DATA

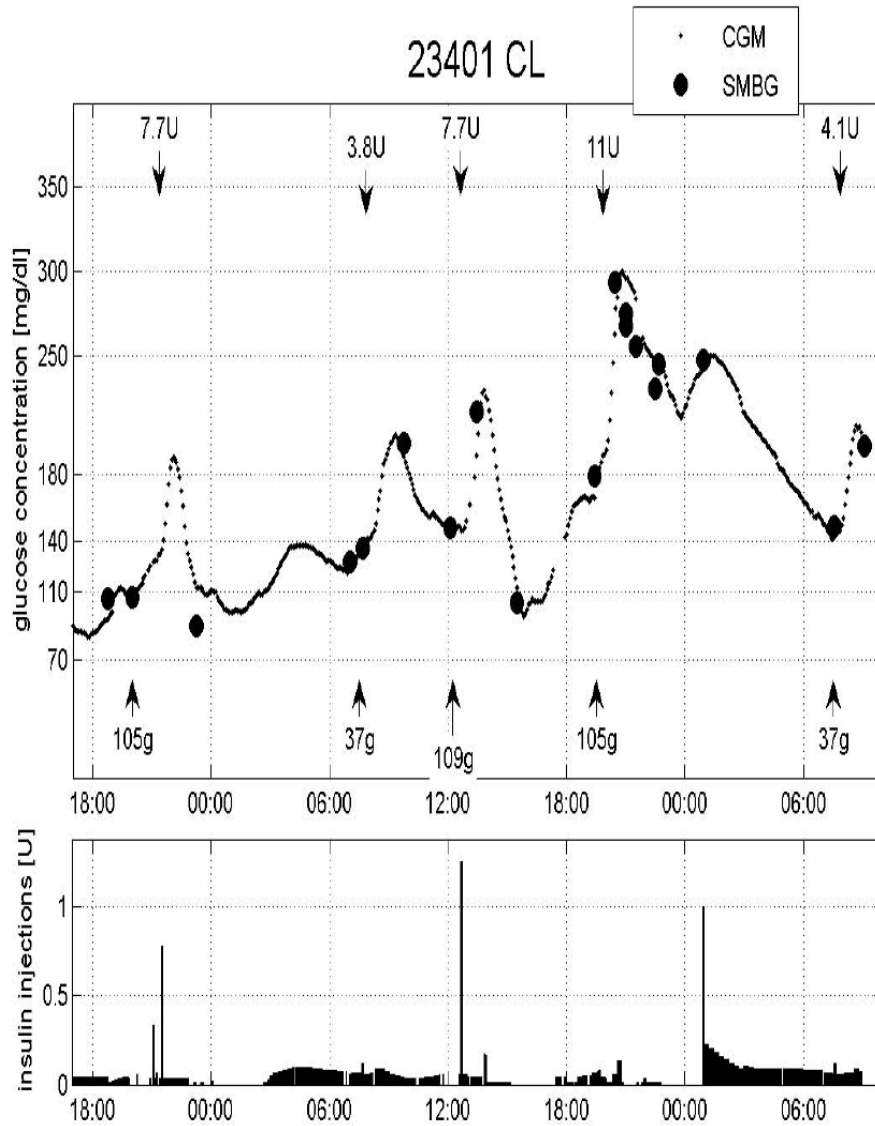

SUPPLEMENTARY DATA

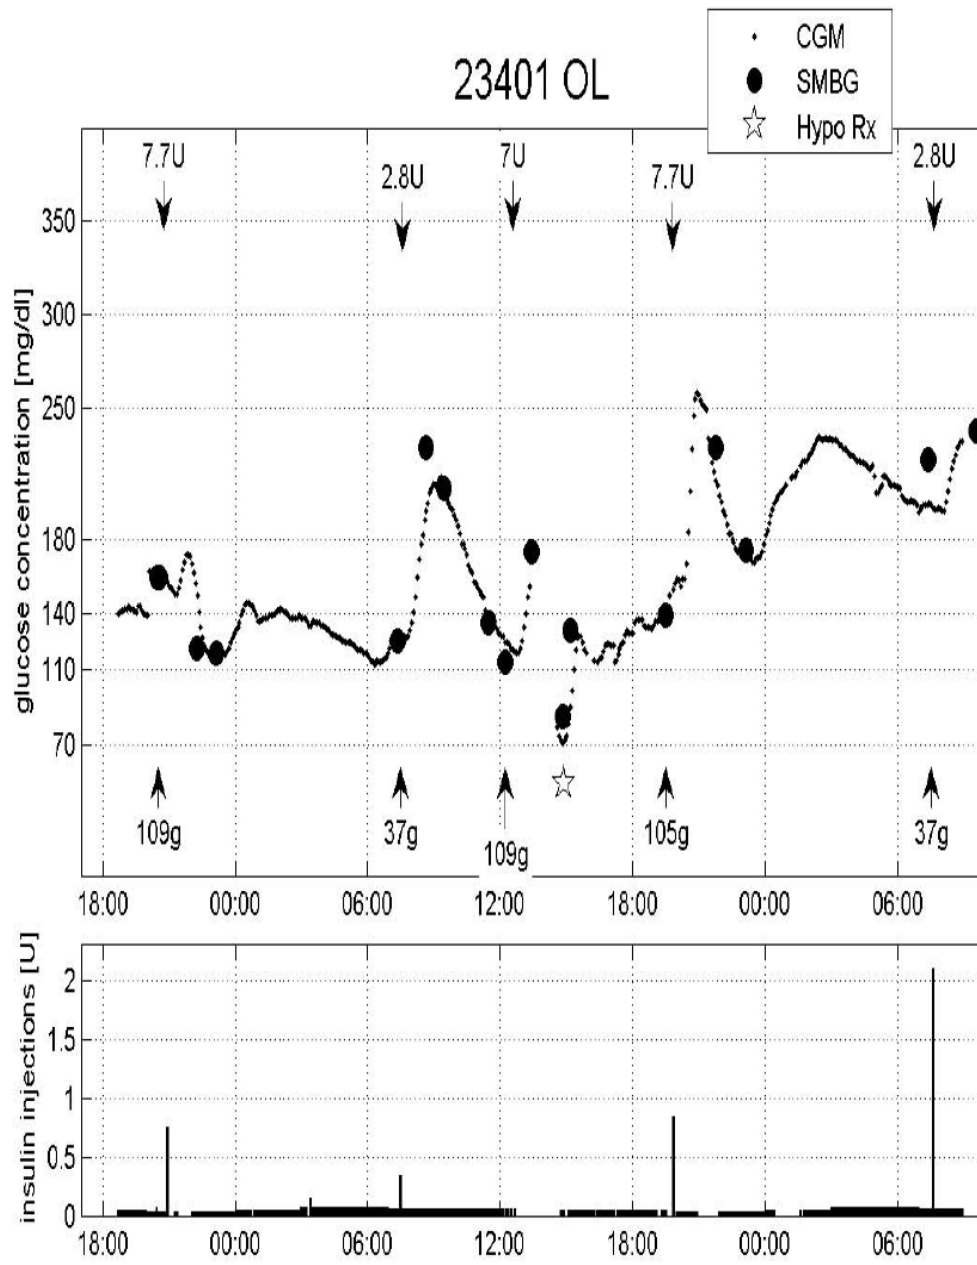

SUPPLEMENTARY DATA

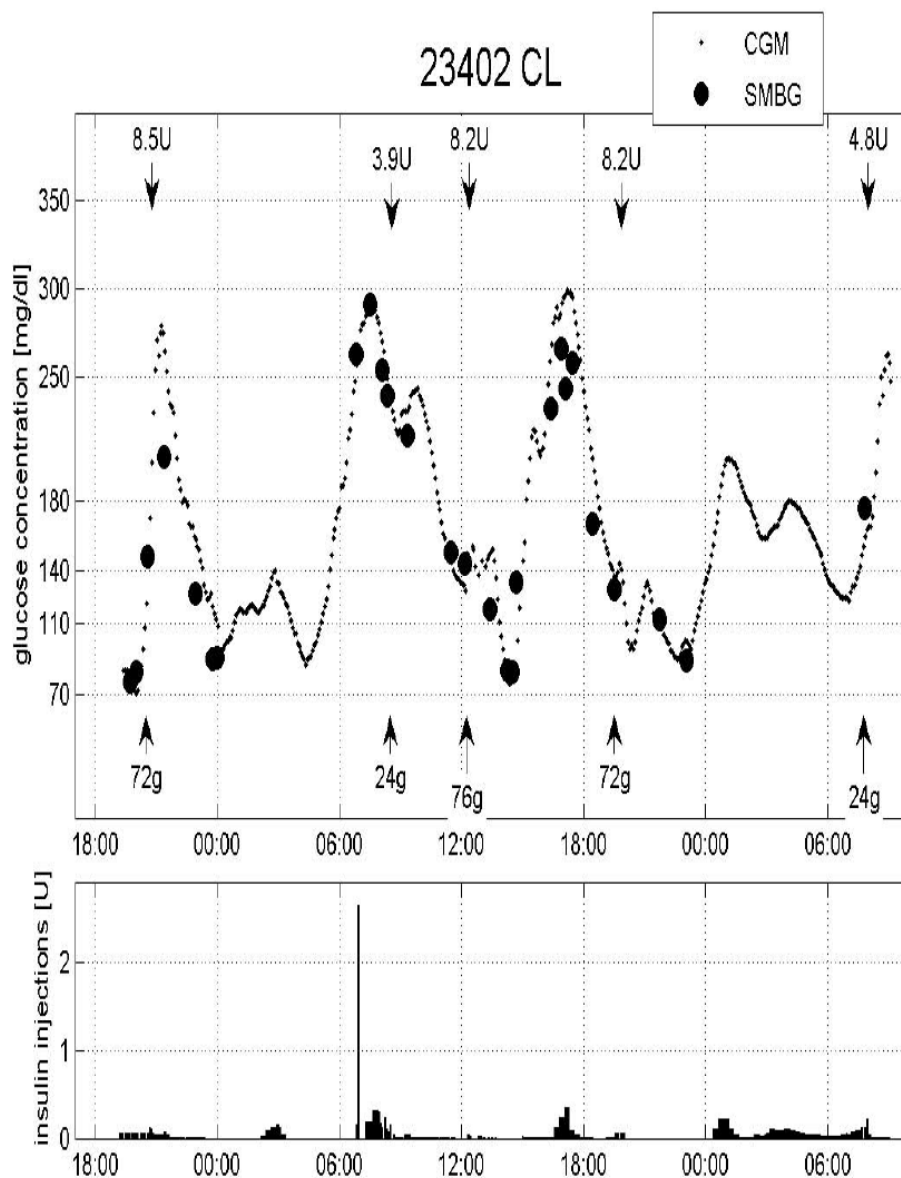

SUPPLEMENTARY DATA

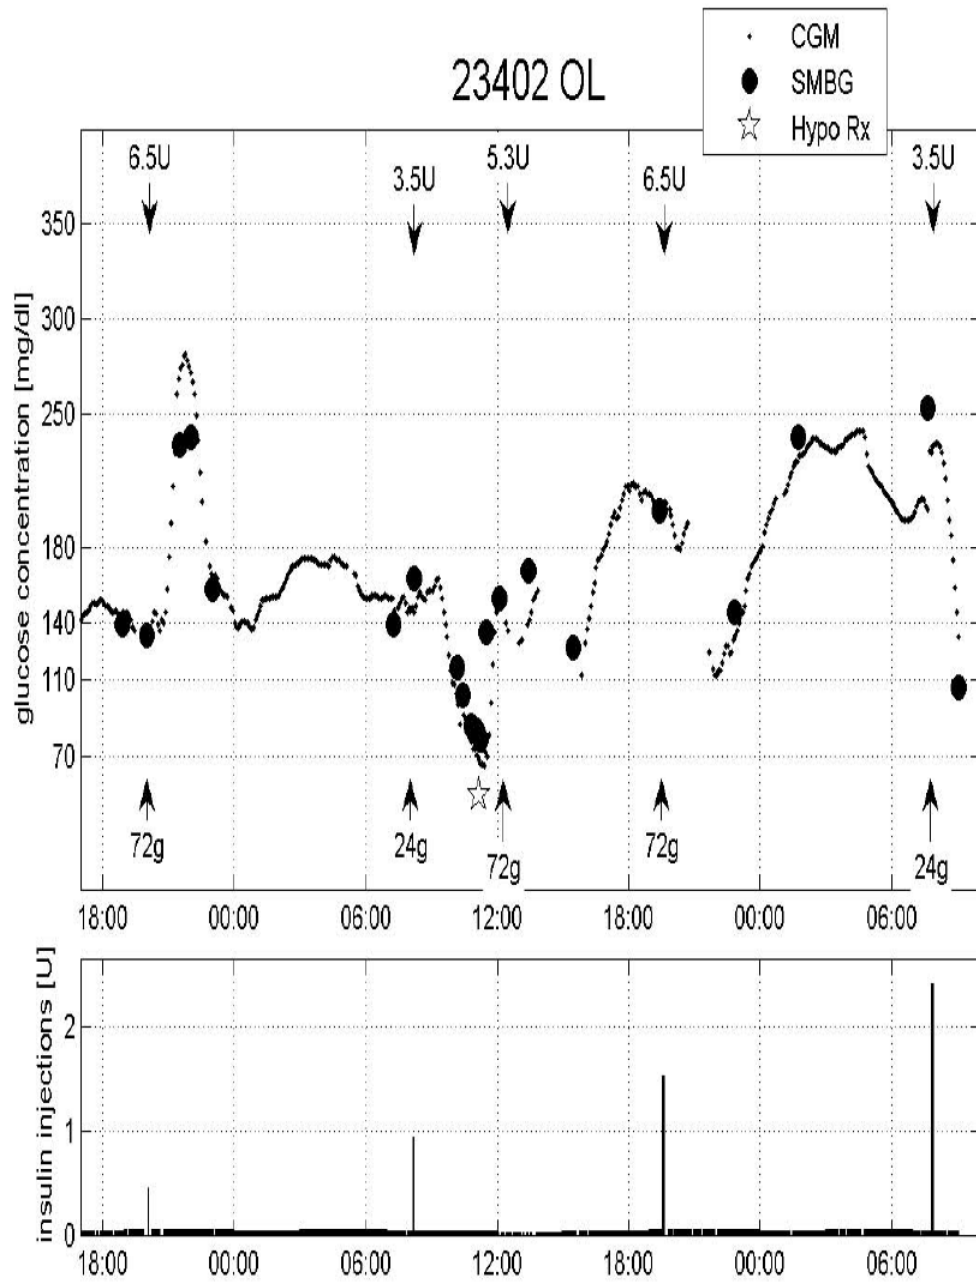

SUPPLEMENTARY DATA

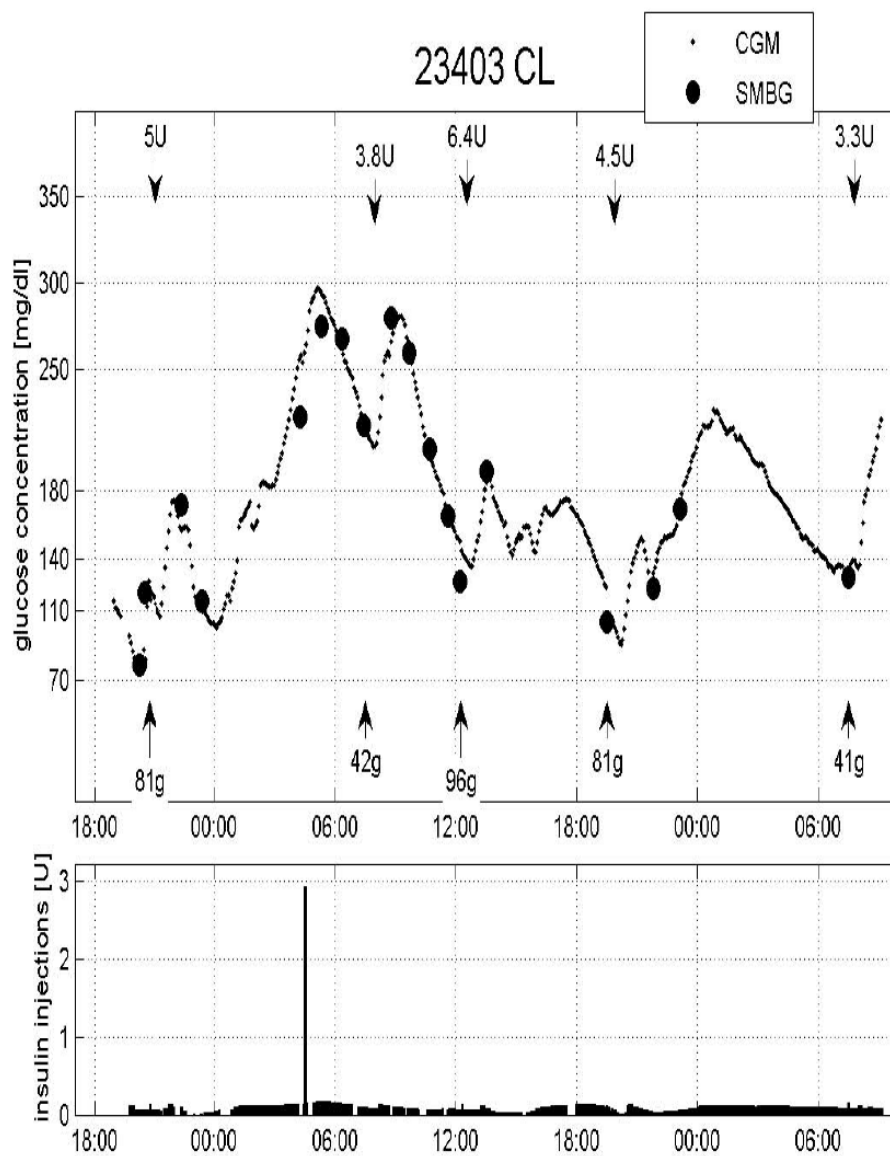

SUPPLEMENTARY DATA

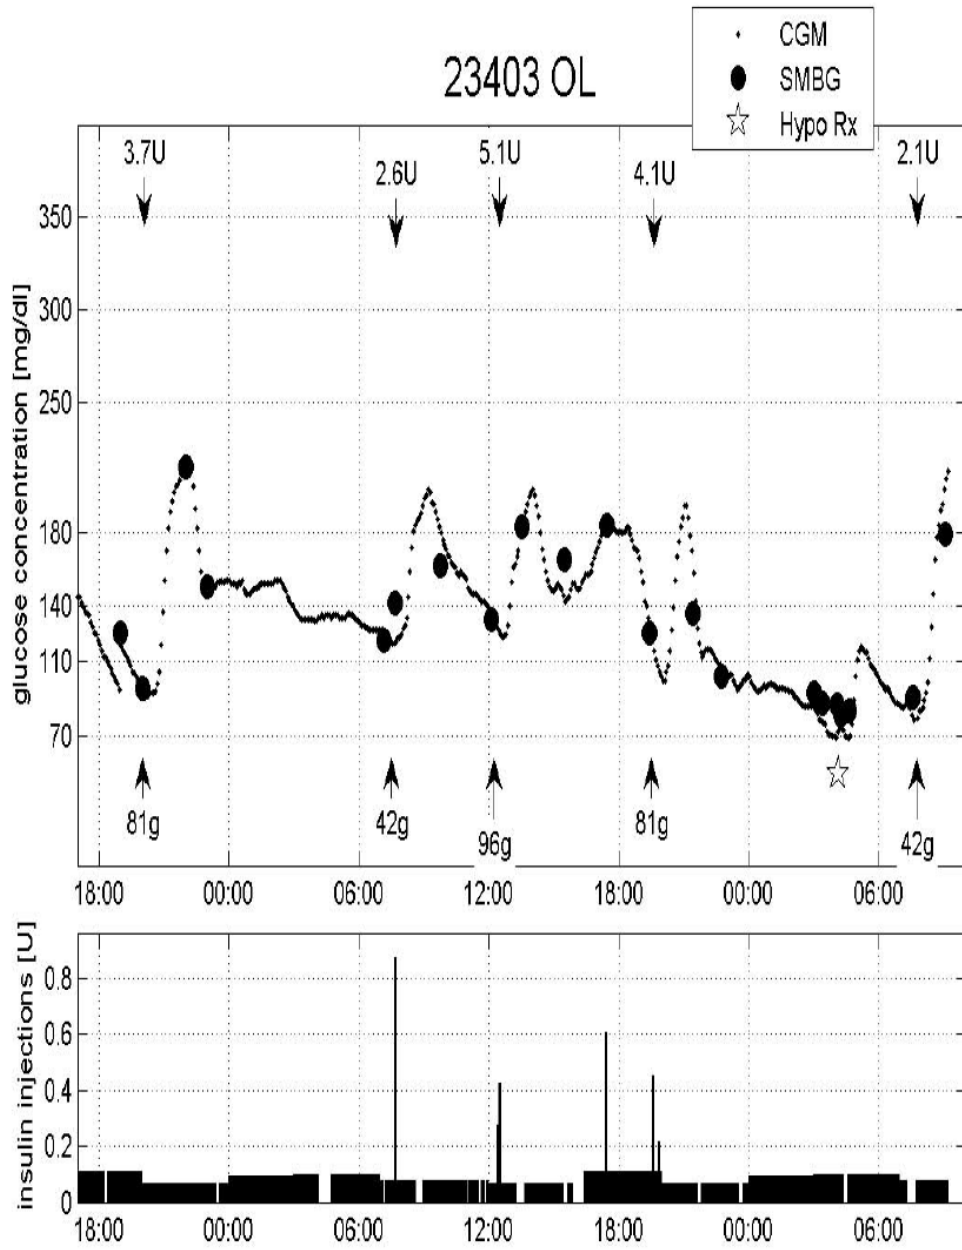



SUPPLEMENTARY DATA

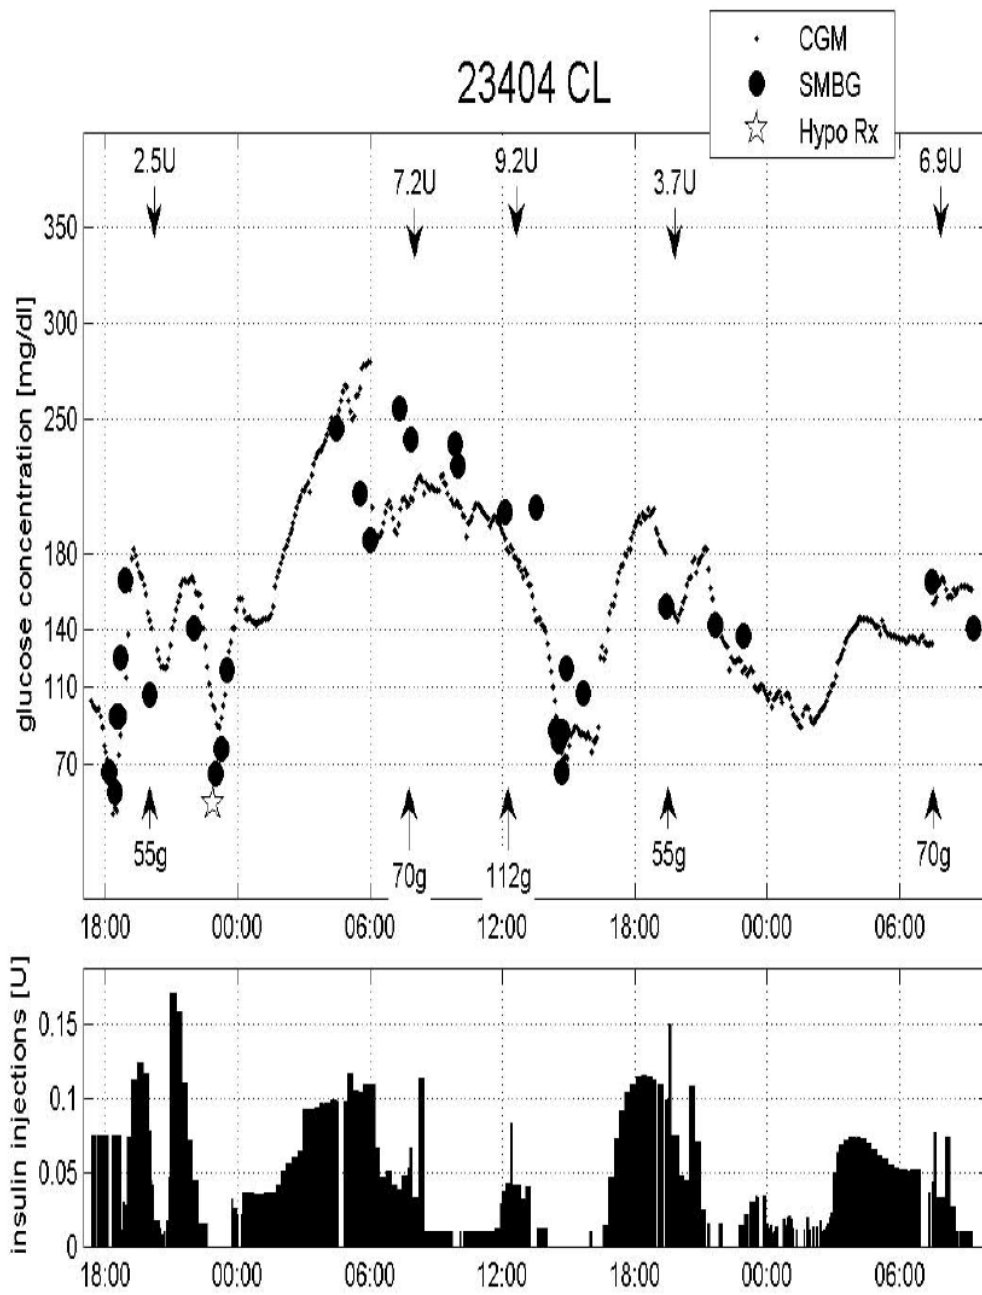

SUPPLEMENTARY DATA

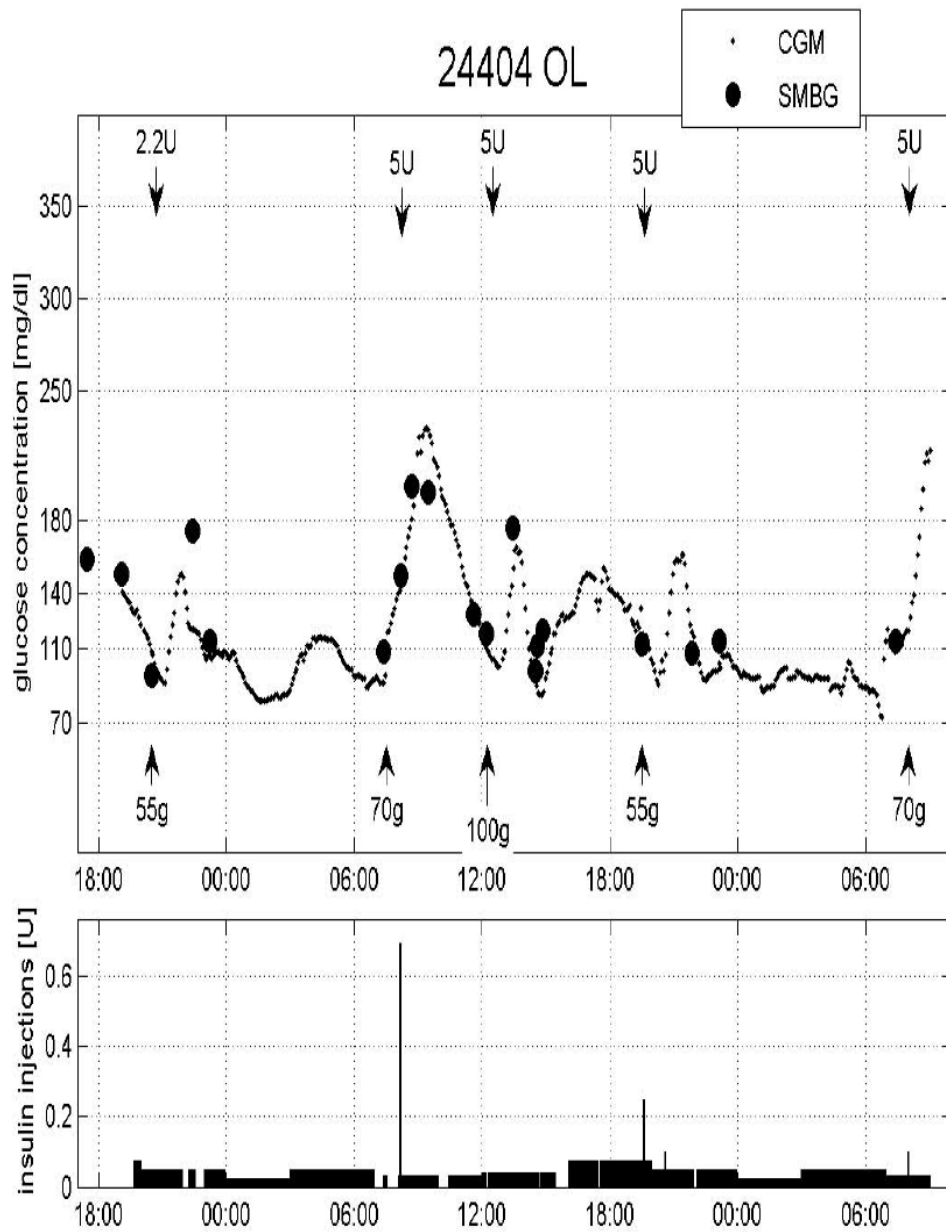

SUPPLEMENTARY DATA

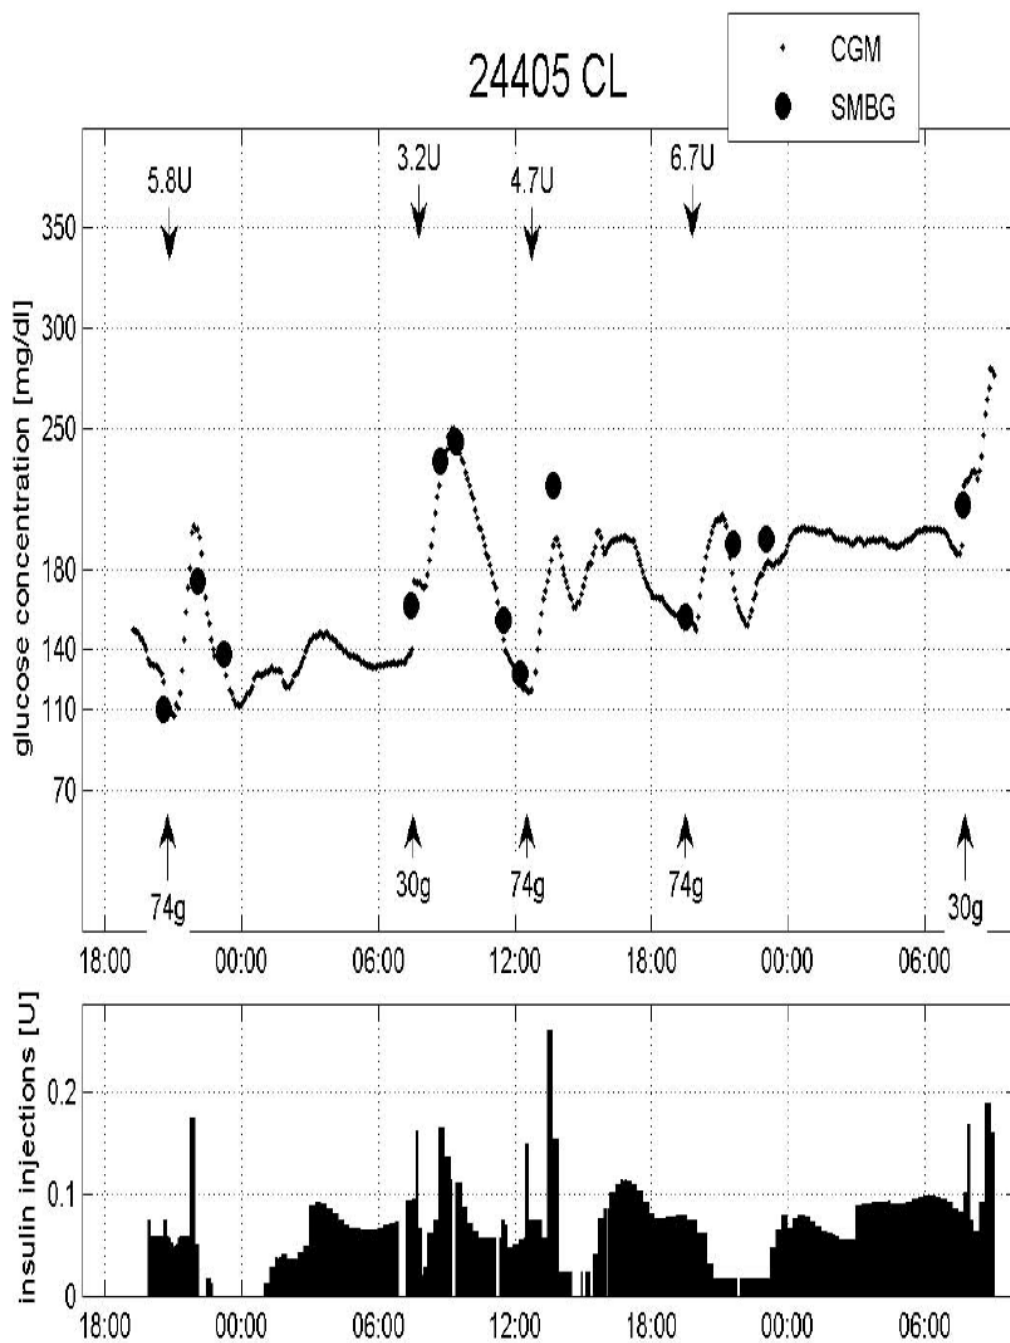

SUPPLEMENTARY DATA

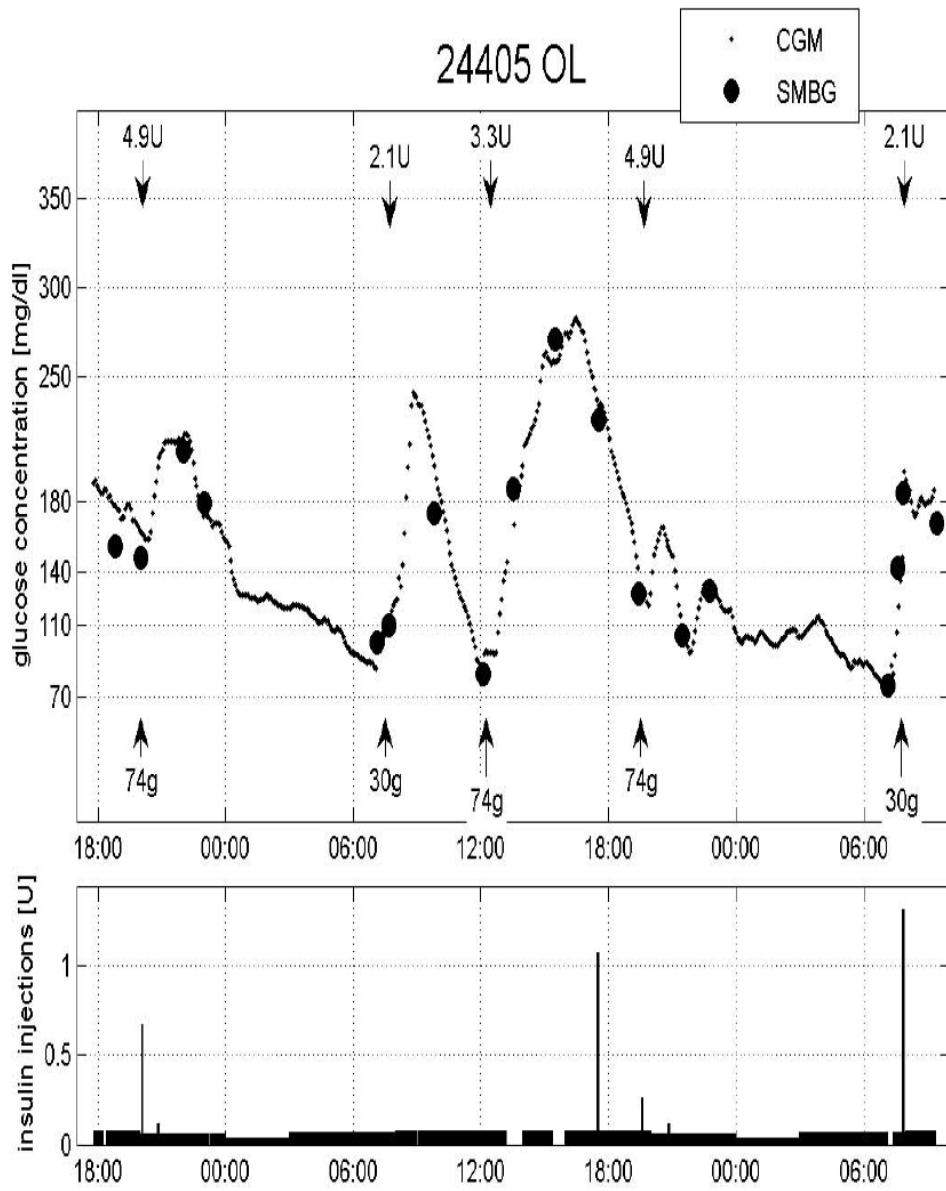

Supplement: dc132076supplementarydata.pdf [file dc132076supplementarydata.pdf]
